# Supplementary material for: Transcriptome profiling of non-climacteric ‘yellow’ melon during ripening: insights on sugar metabolism
Source: PubMed Central journal article supplement (PMC7106763; doi:10.1186/s12864-020-6667-0), 2020-03-30

**Table S3** Target genes and reference genes used in RT-qPCR analysis.

| Gene                                | Short Form         | Primer 5' – 3'                                          | Product size (bp) | Temperature (°C) |
|-------------------------------------|--------------------|---------------------------------------------------------|-------------------|------------------|
| Neutral alpha-galactosidase 2       | <i>CmNAG2</i>      | F – TTCCTGTGGTATCGATGGCG<br>R – ATGAATGGTGTGGGAGGCAG    | 258               | 62°C             |
| Acid Invertase 2                    | <i>CmAIN2</i>      | F – CTCGATCTGTCAAAAAGCAGC<br>R – TTCCCAAACGCCCTAAAG     | 213               | 62°C             |
| New putative invertase inhibitor    | <i>CmINH-Like3</i> | F' CTCGCATTTTCCTTCGTTGT<br>R' AAAGTCCGCCGTGTCGCT        | 164               | 62°C             |
| UDPGlc epimerase 3                  | <i>CmUGE3</i>      | F – CTGTTGGGGAGAGTGTGCT<br>R – GCTTCGTCCGACCATAAGGA     | 203               | 62°C             |
| Sucrose synthase 1                  | <i>CmSUS1</i>      | F - AACCGTGTTTCATAGCCTCCG<br>R – TCAGGACTTCCCAAATGCC    | 195               | 64°C             |
| Sucrose synthase 2                  | <i>CmSUS2</i>      | F - TCCAGATGCGAAGGGGACTA<br>R – ATCCGGCTTTGCTTCCATGA    | 204               | 62°C             |
| Sucrose-P-Synthase 1                | <i>CmSPS2</i>      | F - AGTTCGTTTCTTCGTTTGGCT<br>R – TTGGCGCTTCTTTTGTGATGG  | 198               | 62°C             |
| Sucrose-P-Phosphatase 1             | <i>CmSPP1</i>      | F' TATCGTCACTCTTCTCCAC<br>R' CATGAGACGTGCTGAAGCG        | 182               | 60°C             |
| Cytosolic 40s Ribosomal protein S15 | <i>CmRPS15</i>     | F - GAAGCTGCGTAAAGCGAAAC<br>R – GGTCTTTCCATTGTAAACTCCAA | 132               | 62°C             |
| 60s Ribosomal protein L             | <i>CmRPL</i>       | F - CGACAATACTGGAGCCAAGAA<br>R – CATCACCATATCTCCCACACAA | 100               | 62°C             |

**Figure S2** Pearson's correlation between 10 DAP and 40 DAP development stage. The expression ratio for RNA-seq and RT-qPCR analysis are represented by log<sub>2</sub> FoldChange.

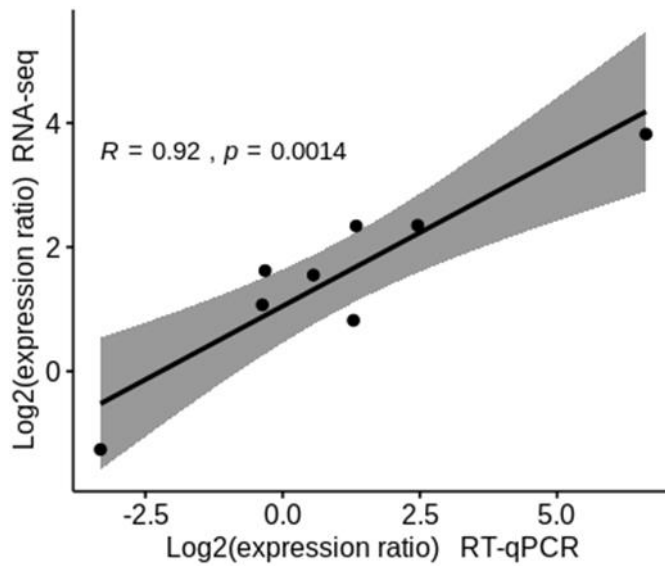

Supplement: 12864_2020_6667_MOESM3_ESM.pdf [file 12864_2020_6667_MOESM3_ESM.pdf]
