# Supplementary material for: Transcriptome profiling of non-climacteric ‘yellow’ melon during ripening: insights on sugar metabolism
Source: PubMed Central journal article supplement (PMC7106763; doi:10.1186/s12864-020-6667-0), 2020-03-30
Supplement: 12864_2020_6667_MOESM6_ESM.pdf [file 12864_2020_6667_MOESM6_ESM.pdf]

**Table S5:** The top 50 DE genes between young (10 DPA) and mature (40 DAP) fruits samples.

| Melonomics ID (v4.0) | RefSeq         | Description    | Pathway (KEGG)*                                    | Log2 FoldChange                              | padj     |             |
|----------------------|----------------|----------------|----------------------------------------------------|----------------------------------------------|----------|-------------|
| 1                    | MELO3C010353.2 | XP_008444009.1 | protein NRT1/ PTR FAMILY 6.2-like                  | -                                            | 3.455867 | 4.106e-34   |
| 2                    | MELO3C017480.2 | NP_001284442.1 | Xyloglucan endotransglucosylase/hydrolyase         | cmo04075                                     | 3.967615 | 5.3832e-32  |
| 3                    | MELO3C016259.2 | XP_016903401.1 | Bidirectional sugar transporter SWEET              | cmo00001                                     | 2.88248  | 1.1448e-09  |
| 4                    | MELO3C027112.2 | XP_008453627.1 | Protein PHLOEM PROTEIN 2-LIKE A1                   | -                                            | 3.2693   | 3.0634e-10  |
| 5                    | MELO3C004351.2 | XP_008446316.1 | probable pectate lyase P59                         | cmo00040                                     | 4.34667  | 1.79131e-49 |
| 6                    | MELO3C010210.2 | XP_008443031.1 | Unknown protein                                    | -                                            | 4.45075  | 2.3567e-35  |
| 7                    | MELO3C022828.2 | XP_008460506.1 | Glutamine synthetase                               | cmo00220/cmo00250/cmo00630/cmo00910/cmo01230 | 4.541077 | 3.6177e-42  |
| 8                    | MELO3C012053.2 | XP_016903282.1 | thioredoxin H-type                                 | cmo00001                                     | 4.937584 | 8.70463e-35 |
| 9                    | MELO3C020823.2 | XP_016901630.1 | Heparan-alpha-glucosaminide N-acetyltransferase    | -                                            | 3.550465 | 1.8113e-29  |
| 10                   | MELO3C007006.2 | XP_008459054.1 | Protein PHLOEM PROTEIN 2-LIKE A9                   | -                                            | 3.986353 | 2.7978e-37  |
| 11                   | MELO3C015868.2 | XP_008451400.1 | 2OG-Fe(II) oxygenase family oxidoreductase         | -                                            | 3.909021 | 4.6833e-31  |
| 12                   | MELO3C005442.2 | XP_008453829.1 | BnaC09g40830D protein                              | -                                            | 4.078132 | 8.9163e-13  |
| 13                   | MELO3C024920.2 | XP_008462987.1 | zinc transporter 11                                | cmo00001                                     | 5.20622  | 4.8623e-63  |
| 14                   | MELO3C025265.2 | XP_008447666.1 | glycogen synthase kinase-3 homolog MsK-3           | cmo00001                                     | -4.17374 | 1.4152e-18  |
| 15                   | MELO3C018536.2 | XP_008455060.1 | pathogenesis-related protein 1-like                | cmo04016/cmo04075/cmo04626                   | -4.71659 | 1.2173e-16  |
| 16                   | MELO3C029935.2 | XP_008451399.1 | mitochondrial ubiquitin ligase activator of NFKB 1 | cmo00001                                     | -3.90787 | 3.8504e-15  |
| 17                   | MELO3C001321.2 | XP_016901186.1 | ubiquitin carboxyl-terminal hydrolase 25           | cmo00001                                     | -5.61825 | 2.0827e-11  |
| 18                   | MELO3C027687.2 | XP_008459469.1 | Histone-lysine N-methyltransferase ATXR3           | -                                            | -7.21777 | 1.3361e-11  |
| 19                   | MELO3C024834.2 | XP_008442759.1 | protein DMR6-LIKE OXYGENASE 2-like                 | -                                            | -3.42299 | 0.0043      |
| 20                   | MELO3C027648.2 | XP_008452461.1 | Translation initiation factor IF-1, chloroplastic  | -                                            | -3.53993 | 0.0042      |
| 21                   | MELO3C000330.2 | XP_008444202.1 | DNA-directed RNA polymerase subunit beta"          | cmo00001                                     | -4.62797 | 0.0009      |
| 22                   | MELO3C025247.2 | YP_004841763.1 | Photosystem II 32 kDa protein                      | -                                            | -3.18283 | 0.0469      |
| 23                   | MELO3C018627.2 | XP_008455196.1 | 7-deoxyloganetin glucosyltransferase-like          | -                                            | 4.636456 | 1.36143e-21 |
| 24                   | MELO3C016297.2 | XP_016902861.1 | Nucleoside diphosphate                             | cmo00001                                     | 4.840522 | 4.4364      |

|    |                |                |                                                     |                                     |                      |
|----|----------------|----------------|-----------------------------------------------------|-------------------------------------|----------------------|
|    |                | kinase         |                                                     |                                     | e-27                 |
| 25 | MELO3C025456.2 | XP_008446238.1 | WAT1-related protein                                | -                                   | 5.17524 4.9317e-28   |
| 26 | MELO3C033058.2 | XP_008443490.1 | WAT1-related protein                                | -                                   | 4.72164 0.0490       |
| 27 | MELO3C029341.2 | XP_008450882.1 | Harbinger transposase-derived nuclease              | cmo00001                            | 3.968895 7.2539e-09  |
| 28 | MELO3C021426.2 | XP_008442833.1 | Protein TERMINAL FLOWER 1                           | cmo00001                            | 6.645424 0.0006      |
| 29 | MELO3C021350.2 | XP_008455946.1 | monothiol glutaredoxin-S2-like                      | -                                   | 7.382433 1.1348e-34  |
| 30 | MELO3C018509.2 | XP_008451903.1 | Glutamate racemase                                  | -                                   | 7.972957 0.01232     |
| 31 | MELO3C015214.2 | XP_008450452.1 | beta-glucosidase 24                                 | cmo00460/cmo00500/cmo00940/cmo01110 | 4.527561 0.0006      |
| 32 | MELO3C018593.2 | XP_008447193.1 | Cysteine proteinase inhibitor                       | -                                   | 3.978864 1.0020e-12  |
| 33 | MELO3C008672.2 | XP_008441807.1 | Indole-3-acetic acid-amido synthetase GH3.3         | cmo00001                            | 3.942719 1.7872e-19  |
| 34 | MELO3C015257.2 | XP_008450545.1 | nicotianamine synthase-like                         | -                                   | 5.290715 0.02312     |
| 35 | MELO3C033658.2 | XP_008446132.1 | protein GLE1                                        | cmo00001                            | 4.827639 0.0002      |
| 36 | MELO3C020271.2 | XP_008443791.1 | major latex protein 15-like                         | cmo00001                            | 6.545427 1.4251e-50  |
| 37 | MELO3C022518.2 | XP_008460146.1 | gibberellin 20 oxidase 1-like                       | cmo00270/cmo01110                   | 9.98387 2.7101e-12   |
| 38 | MELO3C018880.2 | XP_008455506.1 | Glycine-rich protein                                | -                                   | 10.05126 0.0009      |
| 39 | MELO3C003375.2 | XP_008465934.1 | Two-component response regulator-like protein APRR2 | -                                   | 3.390193 1.6566e-27  |
| 40 | MELO3C009210.2 | XP_008464642.1 | Class I heat shock protein                          | cmo00001                            | 3.549776 3.28682e-41 |
| 41 | MELO3C014821.2 | XP_008450029.1 | Cystinosin-like protein                             | cmo00001                            | 3.769818 1.5965e-17  |
| 42 | MELO3C025101.2 | XP_008463167.1 | Sucrose synthase 2                                  | cmo00500                            | 3.827967 1.4299e-41  |
| 43 | MELO3C010875.2 | XP_008445562.1 | Calcium-binding EF-hand                             | -                                   | 3.241976 2.2164e-32  |
| 44 | MELO3C018882.2 | XP_008456303.1 | Unknown protein                                     | -                                   | 2.890856 2.6924e-13  |
| 45 | MELO3C003132.2 | XP_008442554.1 | Metallothionein-like protein 4A                     | -                                   | 4.568294 1.1824e-44  |
| 46 | MELO3C029417.2 | XP_008459177.1 | Unknown protein                                     | -                                   | -5.10999 3.0834e-36  |
| 47 | MELO3C014045.2 | XP_016900654.1 | (-)-germacrene D synthase-like                      | cmo00909                            | -5.99705 5.9103e-72  |
| 48 | MELO3C031475.2 | XP_008445976.1 | Unknown protein                                     | cmo00001                            | -5.20179 1.1984e-08  |
| 49 | MELO3C003917.2 | XP_008450536.1 | Heat shock 70 kDa protein                           | cmo03040/cmo04141/cmo04144          | -3.04529 3.3153e-32  |
| 50 | MELO3C019470.2 | XP_008462393.1 | glutelin type-A 2-like                              | -                                   | -3.32639 1.4299e-41  |

\*cmo00001: Brite Hierarchies; cmo00040: Pentose and glucuronate interconversions; cmo00220: Arginine biosynthesis; cmo00250: Alanine, aspartate and glutamate metabolism; cmo00270: Cysteine and methionine metabolism; cmo00460: Cyanoamino acid metabolism; cmo00500: Starch and sucrose metabolism; cmo00630: Glyoxylate and dicarboxylate metabolism; cmo00910: Nitrogen metabolism;

cmo00940: Phenylpropanoid biosynthesis; cmo00909: Sesquiterpenoid and triterpenoid biosynthesis; cmo01110: Biosynthesis of secondary metabolites; cmo01230: Biosynthesis of amino acids; cmo03040: Spliceosome; cmo04141: Protein processing in endoplasmic reticulum; cmo04144: Endocytosis; 04075: Plant hormone signal transduction;

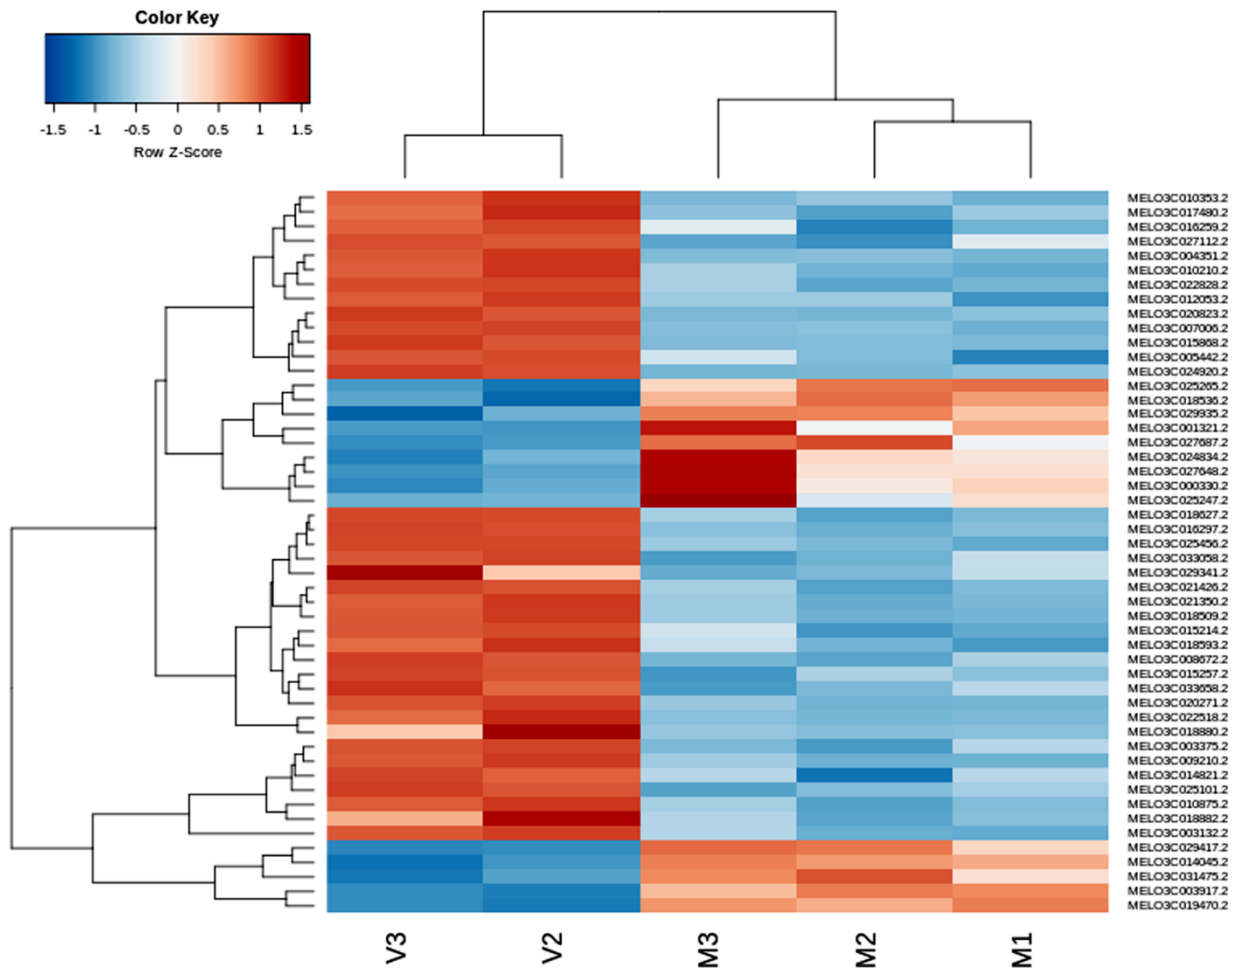

**Figure S4** Hierarchical clustering analyses of DE top 50 genes between young (10 DPA) and mature (40 DAP) fruits samples. The log<sub>2</sub> fold change values were converted by rlog (regularized logarithm) function in Deseq2. Each lines represents one gene and the rows the samples. The color bar represents the rlog values and ranges from blue (low gene expression) to red (high gene expression).
