# Supplementary material for: Transcriptome profiling of non-climacteric ‘yellow’ melon during ripening: insights on sugar metabolism
Source: PubMed Central journal article supplement (PMC7106763; doi:10.1186/s12864-020-6667-0), 2020-03-30
Supplement: 12864_2020_6667_MOESM7_ESM.pdf [file 12864_2020_6667_MOESM7_ESM.pdf]

**Table S6:** Differential expressed genes present on KEGG enrichment pathways (Fisher exact test  $\leq 0.05$ ).**10 DAP fruit****1) Plant hormone signal transduction**

| ID                        | Gene Name                                                         | Species      | Log2 FoldChange |
|---------------------------|-------------------------------------------------------------------|--------------|-----------------|
| <b>Gibberilin</b>         |                                                                   |              |                 |
| 103502508/XP_008464685.1  | transcription factor PIF4-like(LOC103502508)                      | Cucumis melo | 2.9819          |
| 103496794 /XP_008457015.1 | DELLA protein GAI-like(LOC103496794)                              | Cucumis melo | 2.0955          |
| <b>Auxin</b>              |                                                                   |              |                 |
| 103493078/XP_008451925.1  | auxin response factor 18-like(LOC103493078)                       | Cucumis melo | 1.3779          |
| 103490323/XP_008448013.1  | auxin-induced protein 15A-like(LOC103490323)                      | Cucumis melo | 6.4446          |
| 103489925/XP_008447319.1  | auxin-induced protein 22A-like(LOC103489925)                      | Cucumis melo | 1.2787          |
| 103499752/XP_008461049.1  | auxin-induced protein IAA6(LOC103499752)                          | Cucumis melo | 1.1910          |
| 103489837/XP_008447371.1  | auxin-responsive protein IAA11(LOC103489837)                      | Cucumis melo | 2.1070          |
| 103499461/XP_008460695.1  | auxin-responsive protein IAA13(LOC103499461)                      | Cucumis melo | 2.6297          |
| /XP_008460694.1           |                                                                   |              |                 |
| 103488149/XP_008444965.1  | auxin-responsive protein IAA9-like(LOC103488149)                  | Cucumis melo | 1.6545          |
| 103493400/XP_008452341.1  | indole-3-acetic acid-amido synthetase GH3.6(LOC103493400)         | Cucumis melo | 5.7328          |
| 103485860/XP_008441807.1  | indole-3-acetic acid-amido synthetase GH3.5-like(LOC103485860)    | Cucumis melo | 3.9427          |
| 103490488/XP_008448232.1  | indole-3-acetic acid-amido synthetase GH3.6-like(LOC103490488)    | Cucumis melo | 2.5520          |
| <b>Acid Jasmonic</b>      |                                                                   |              |                 |
| 103490781/XP_008448683.1  | transcription factor MYC2-like(LOC103490781)                      | Cucumis melo | 1.9132          |
| 103501422/XP_008463217.1  | coronatine-insensitive protein 1(LOC103501422)                    | Cucumis melo | 0.6774          |
| <b>Brassinosteroid</b>    |                                                                   |              |                 |
| 103495262/XP_008454979.1  | cyclin-D3-3(LOC103495262)                                         | Cucumis melo | 0.8344          |
| 103487865/XP_008444594.1  | cyclin-D3-3-like(LOC103487865)                                    | Cucumis melo | 2.6610          |
| 103502635/XP_008464872.1  | probable serine/threonine-protein kinase At4g35230(LOC103502635)  | Cucumis melo | 0.9627          |
| 103482744/XP_008437265.1  | probable serine/threonine-protein kinase At5g41260(LOC103482744)  | Cucumis melo | 0.8628          |
| <b>Cytokinin</b>          |                                                                   |              |                 |
| 103487743/XP_008444405.1  | two-component response regulator ARR11(LOC103487743)              | Cucumis melo | 1.8855          |
| 103488557/XP_016899933.1  | histidine-containing phosphotransfer protein 4-like(LOC103488557) | Cucumis melo | 2.6155          |
| <b>Abscisic acid</b>      |                                                                   |              |                 |
| 103488507/XP_008445513.1  | protein phosphatase 2C 77-like(LOC103488507)                      | Cucumis melo | 1.5051          |

**Obs.:** The auxin response factor 3 (103484487/XP\_016899372.1), auxin response factor 1 (103499376/XP\_008460595.1) and indole 3-acetic acid-induce protein ARG7 isoenzymes are more expressed in downstream 40 DAP fruit auxin pathway (-0.7381, -0.7397 and -1.13863 log<sub>2</sub> FoldChange respectively). In the downstream ethylene and salicylic acid pathways the genes ethylene receptor 1 (103492012/XP\_008450396.1/-1.285086703 log<sub>2</sub>FoldChange) and pathogenesis-related protein 1 (103495326/XP\_008455060.1/-4.71658675 log<sub>2</sub> FoldChange) are more expressed respectively. In the abscisic acid biosynthesis the 9-cis-epoxycarotenoid dioxygenase ((103493037XP\_008451876.1/-1.79) is more expressed in 40 DAP fruit.

**2) Carbon metabolism**

| ID                       | Gene Name                                                                 | Species      | Log2 FoldChange |
|--------------------------|---------------------------------------------------------------------------|--------------|-----------------|
| 103498931/XP_008459982.1 | alcohol dehydrogenase class-3(LOC103498931)                               | Cucumis melo | 0.7665          |
| 103485188/XP_008440909.1 | aminomethyltransferase, mitochondrial(LOC103485188)                       | Cucumis melo | 1.0930          |
| 103502185/XP_008464259.1 | aspartate aminotransferase, mitochondrial-like(LOC103502185)              | Cucumis melo | 1.5208          |
| 103502619/XP_008464839.1 | catalase isozyme 3(LOC103502619)                                          | Cucumis melo | 0.7841          |
| 103488872/XP_008446019.1 | cysteine synthase(LOC103488872)                                           | Cucumis melo | 1.0895          |
| 103485981/XP_008441982.1 | glutamate dehydrogenase 1(LOC103485981)                                   | Cucumis melo | 2.2010          |
| 103492923/XP_008451713.1 | malate dehydrogenase, mitochondrial(LOC103492923)                         | Cucumis melo | 1.0899          |
| 103489191/XP_008446456.1 | probable 6-phosphogluconolactonase 1(LOC103489191)                        | Cucumis melo | 1.1631          |
| 103483866/XP_016898966.1 | probable acyl-CoA dehydrogenase IBR3(LOC103483866)                        | Cucumis melo | 1.0748          |
| 103498321/XP_008459117.1 | probable ribose-5-phosphate isomerase 4, chloroplastic(LOC103498321)      | Cucumis melo | 1.5180          |
| 103500862/XP_008462524.1 | pyruvate kinase 2, cytosolic-like(LOC103500862)                           | Cucumis melo | 1.5922          |
| 103483770/XP_008438755.1 | pyruvate, phosphate dikinase, chloroplastic(LOC103483770)                 | Cucumis melo | 1.6250          |
| 103503511/XP_008465941.1 | ribose-phosphate pyrophosphokinase 1-like(LOC103503511)                   | Cucumis melo | 1.2528          |
| 103489286/XP_008446602.1 | ribulose biphosphate carboxylase small chain, chloroplastic(LOC103489286) | Cucumis melo | 1.5461          |
| 103485491/XP_008441351.1 | ribulose-phosphate 3-epimerase, cytoplasmic isoform(LOC103485491)         | Cucumis melo | 1.0046          |
| 103484921/XP_016899268.1 | uncharacterized LOC103484921(LOC103484921)                                | Cucumis melo | 2.3091          |

**3) Starch and sucrose metabolism**

| ID                       | Gene Name                                     | Species      | Log2 FoldChange |
|--------------------------|-----------------------------------------------|--------------|-----------------|
| 103504616/NP_001284469.1 | acid beta-fructofuranosidase-like(INV2)       | Cucumis melo | 2.3437          |
| 103490714/MELO3C013786.2 | alpha-glucosidase 2(LOC103490714)             | Cucumis melo | 1.0610          |
| 103494776/XP_008454350.1 | beta-glucosidase 11-like(LOC103494776)        | Cucumis melo | 2.0601          |
| 103493887/XP_008453064.2 | beta-glucosidase 18-like(LOC103493887)        | Cucumis melo | 1.7016          |
| 103492048/XP_008450452.1 | beta-glucosidase 24(LOC103492048)             | Cucumis melo | 4.5275          |
| 103504550/XP_008467118.1 | phosphoglucomutase, cytoplasmic(LOC103504550) | Cucumis melo | 0.8392          |

|                           |                                                                                  |              |        |
|---------------------------|----------------------------------------------------------------------------------|--------------|--------|
| 103489022/ XP_008446229.1 | probable alpha, alpha-trehalose-phosphate synthase [UDP-forming] 9(LOC103489022) | Cucumis melo | 1.1209 |
| 103493790/XP_008452915.1  | probable alpha-amylase 2(LOC103493790)                                           | Cucumis melo | 0.9488 |
| 103496894/XP_008457154.1  | probable sucrose-phosphate synthase 2(LOC103496894)                              | Cucumis melo | 1.6219 |
| 103484159/XP_008439346.1  | probable trehalose-phosphate phosphatase C(LOC103484159)                         | Cucumis melo | 3.7901 |
| 103501373/XP_008463167.1  | sucrose synthase 2(LOC103501373)                                                 | Cucumis melo | 3.8279 |

Obs.: The sucrose synthase 1(103492399/MELO3C004346, log2 FoldChange: -2.280855057), glucan endo -1,3  $\beta$  - glucosidase (103485208/ XP\_008440956.1/- log2 FoldChange: 1.8416 ), sucrose-phosphatase 1 (103486711/XP\_008442968.1, log2 FoldChange: 0.829194958); Putative Trehalose-6-phosphate synthase (103490765/XP\_008448661.1, log2 FoldChange:-1.0656); Trehalose-6-phosphate synthase (103495491/XP\_016901732.1, log2 FoldChange: -0.66752696); Beta-amylase (103493026/XP\_008451866.1, log2 FoldChange:-1.246301429); Inactive  $\beta$ -amylase 4 (107990883/ XP\_016900389.1, log2 FoldChange: 1.730691751) are more expressed in 40 DAP fruit.

#### 4) Photosynthesis genes

| ID                       | Gene Name                                                                     | Species      | Log2 FoldChange |
|--------------------------|-------------------------------------------------------------------------------|--------------|-----------------|
| 103490694/XP_008448551.1 | ferredoxin--NADP reductase, leaf isozyme, chloroplastic-like(LOC103490694)    | Cucumis melo | 1.1526          |
| 103484723/XP_008440181.1 | oxygen-evolving enhancer protein 1, chloroplastic(LOC103484723)               | Cucumis melo | 0.6675          |
| 103494958/XP_008454569.1 | photosynthetic NDH subunit of lumenal location 3, chloroplastic(LOC103494958) | Cucumis melo | 1.8491          |
| 103483718/XP_008438687.1 | photosystem I reaction center subunit II, chloroplastic(LOC103483718)         | Cucumis melo | 1.2652          |
| 103485855/XP_008441802.1 | photosystem I reaction center subunit IV, chloroplastic-like(LOC103485855)    | Cucumis melo | 1.7186          |
| 103504056/XP_008466710.1 | photosystem II 22 kDa protein, chloroplastic(LOC103504056)                    | Cucumis melo | 4.5741          |
| 103501654/XP_008463515.1 | psbP-like protein 1, chloroplastic(LOC103501654)                              | Cucumis melo | 0.7721          |

#### 5) Galactose metabolism

| ID                       | Gene Name                                                          | Species      | Log2 FoldChange |
|--------------------------|--------------------------------------------------------------------|--------------|-----------------|
| 103504616/NP_001284469.1 | acid beta-fructofuranosidase-like(INV2)                            | Cucumis melo | 2.3437          |
| 103488794/XP_008445911.1 | alpha-galactosidase(LOC103488794)                                  | Cucumis melo | 1.5210          |
| 103490714/MELO3C013786   | alpha-glucosidase 2(LOC103490714)                                  | Cucumis melo | 1.0610          |
| 103504550/XP_008467118.1 | phosphoglucomutase, cytoplasmic(LOC103504550)                      | Cucumis melo | 0.8392          |
| 103499514/XP_008460758.1 | probable galactinol--sucrose galactosyltransferase 2(LOC103499514) | Cucumis melo | 1.0713          |
| 103487113/XP_008443553.1 | probable galactinol--sucrose galactosyltransferase 5(LOC103487113) | Cucumis melo | 2.4511          |
| 103492745/XP_008451468.1 | stachyose synthase(LOC103492745)                                   | Cucumis melo | 2.4118          |

The raffinose synthase (XP\_008443958.1/ 103487423, log2 FoldChange: -0.933814416), ATP-dependent 6-phosphofructokinase (XP\_008440953.1 / 103485214, Log2FoldChange: -1.185646773) and alpha-glucosidase (MELO3C004346.2, log2FoldChange: -2.2808) are more expressed in 40 DAP fruit.

#### 6) Carbon fixation in photosynthetic organisms

| ID                       | Gene Name                                                                 | Species      | Log2 FoldChange |
|--------------------------|---------------------------------------------------------------------------|--------------|-----------------|
| 103502185/XP_008464259.1 | aspartate aminotransferase, mitochondrial-like(LOC103502185)              | Cucumis melo | 1.5208          |
| 103492923/XP_008451713.1 | malate dehydrogenase, mitochondrial(LOC103492923)                         | Cucumis melo | 1.0899          |
| 103498321/XP_008459117.1 | probable ribose-5-phosphate isomerase 4, chloroplastic(LOC103498321)      | Cucumis melo | 1.5180          |
| 103483770/XP_008438755.1 | pyruvate, phosphate dikinase, chloroplastic(LOC103483770)                 | Cucumis melo | 1.6250          |
| 103489286/XP_008446602.1 | ribulose biphosphate carboxylase small chain, chloroplastic(LOC103489286) | Cucumis melo | 1.5461          |
| 103485491/XP_008441351.1 | ribulose-phosphate 3-epimerase, cytoplasmic isoform(LOC103485491)         | Cucumis melo | 1.0046          |

### 40 DAP

#### 1) Protein processing in endoplasmic reticulum

| ID                        | Gene Name                                                  | Species      | Log2 FoldChange |
|---------------------------|------------------------------------------------------------|--------------|-----------------|
| 103501364/XP_008463154.1  | 15.7 kDa heat shock protein, peroxisomal(LOC103501364)     | Cucumis melo | -1.8992         |
| 103502478/XP_008464642.1  | 17.8 kDa class I heat shock protein-like(LOC103502478)     | Cucumis melo | -1.0400         |
| 103490772/XP_008448675.1  | 18.1 kDa class I heat shock protein-like(LOC103490772)     | Cucumis melo | -2.9855         |
| 103497111/XP_008457419.1  | 18.5 kDa class I heat shock protein-like(LOC103497111)     | Cucumis melo | -3.7264         |
| 103497112/XP_008457420.1  | 18.5 kDa class I heat shock protein-like(LOC103497112)     | Cucumis melo | -1.4691         |
| 103495518/XP_008455327.1  | E3 ubiquitin-protein ligase RMA1H1(LOC103495518)           | Cucumis melo | -1.2754         |
| 103500816/XP_008462466.1  | cell division cycle protein 48 homolog(LOC103500816)       | Cucumis melo | -0.7106         |
| 103502393/XP_008464542.1  | cell division cycle protein 48 homolog(LOC103502393)       | Cucumis melo | -0.7344         |
| 103491749/XP_008450042.1  | class I heat shock protein-like(LOC103491749)              | Cucumis melo | -3.4016         |
| 103492771/XP_008451505.1  | dnaJ protein ERDJ3B(LOC103492771)                          | Cucumis melo | -0.7516         |
| 103489367/XP_008446732.1  | dnaJ protein homolog(LOC103489367)                         | Cucumis melo | -3.5188         |
| 103488055/XP_008444821.1  | endoplasmic reticulum chaperone protein(LOC103488055)      | Cucumis melo | -0.7410         |
| 103492106/XP_008450536.1  | heat shock 70 kDa protein(LOC103492106)                    | Cucumis melo | -3.0452         |
| 103498164/XP_008458892.1  | heat shock cognate 70 kDa protein(LOC103498164)            | Cucumis melo | -0.8653         |
| 103484110/XP_008439282.1  | heat shock protein 83(LOC103484110)                        | Cucumis melo | -0.9152         |
| 103504539/XP_008467106.1  | plant UBX domain-containing protein 2(LOC103504539)        | Cucumis melo | -2.1817         |
| 103495249/XP_008454966.1  | probable E3 ubiquitin ligase SUD1(LOC103495249)            | Cucumis melo | -0.6980         |
| 103487399/XP_008443923.1  | protein OS-9 homolog(LOC103487399)                         | Cucumis melo | -2.2872         |
| 103483120/XP_008437786.1  | protein transport protein Sec61 subunit beta(LOC103483120) | Cucumis melo | -1.2158         |
| 103483006/ MELO3C013946.2 | small heat shock protein, chloroplastic(LOC103483006)      | Cucumis melo | -1.4319         |

|                          |                                                            |              |         |
|--------------------------|------------------------------------------------------------|--------------|---------|
| 103488933/XP_008446109.1 | small heat shock protein, chloroplastic-like(LOC103488933) | Cucumis melo | -1.8242 |
| 103501214/XP_008462954.1 | ubiquitin receptor RAD23b(LOC103501214)                    | Cucumis melo | -0.6879 |
| 103501476/XP_008463276.1 | ubiquitin-conjugating enzyme E2 28(LOC103501476)           | Cucumis melo | -0.7018 |
| 103483220/XP_008437957.1 | ubiquitin-conjugating enzyme E2-17 kDa-like(LOC103483220)  | Cucumis melo | -0.7910 |

## 2) Spliceosome

| ID                       | Gene Name                                                             | Species      | Log2 FoldChange |
|--------------------------|-----------------------------------------------------------------------|--------------|-----------------|
| 103494190/XP_008453490.1 | DEAD-box ATP-dependent RNA helicase 42(LOC103494190)                  | Cucumis melo | -0.9660         |
| 103484204/XP_008439389.1 | DEH-box ATP-dependent RNA helicase DEH12-like(LOC103484204)           | Cucumis melo | -2.0368         |
| 103499294/XP_008460496.1 | THO complex subunit 1(LOC103499294)                                   | Cucumis melo | -0.9537         |
| 103497214/XP_008457549.1 | THO complex subunit 4A(LOC103497214)                                  | Cucumis melo | -0.7584         |
| 103502534/XP_008464716.1 | U4/U6 small nuclear ribonucleoprotein PRP4-like protein(LOC103502534) | Cucumis melo | -1.0175         |
| 103494318/XP_008453669.1 | cell division cycle 5-like protein(LOC103494318)                      | Cucumis melo | -1.1004         |
| 103500640/XP_008462238.1 | crooked neck-like protein 1(LOC103500640)                             | Cucumis melo | -0.8044         |
| 103494047/XP_008453280.1 | glycine-rich RNA-binding protein 2, mitochondrial-like(LOC103494047)  | Cucumis melo | -1.1219         |
| 103492106/XP_008450536.1 | heat shock 70 kDa protein(LOC103492106)                               | Cucumis melo | -3.0452         |
| 103498164/XP_008458892.1 | heat shock cognate 70 kDa protein(LOC103498164)                       | Cucumis melo | -0.8653         |
| 103483553/XP_008438467.1 | pre-mRNA-processing factor 19(LOC103483553)                           | Cucumis melo | -0.7412         |
| 103495367/XP_008455119.1 | pre-mRNA-splicing factor SLU7(LOC103495367)                           | Cucumis melo | -0.6952         |
| 103483592/XP_008438525.1 | pre-mRNA-splicing factor SLU7-like(LOC103483592)                      | Cucumis melo | -0.8591         |
| 103494929/XP_008454536.1 | probable U6 snRNA-associated Sm-like protein LSm4(LOC103494929)       | Cucumis melo | -1.5835         |
| 103497843/XP_008458420.1 | protein pleiotropic regulatory locus 1(LOC103497843)                  | Cucumis melo | -2.3955         |
| 103485621/XP_008441520.1 | sm-like protein LSM3B(LOC103485621)                                   | Cucumis melo | -1.0844         |
| 103501154/XP_008462876.1 | splicing factor 3B subunit 1(LOC103501154)                            | Cucumis melo | -0.7527         |

## 3) Carbon metabolism

| ID                       | Gene Name                                                                        | Species      | Log2 FoldChange |
|--------------------------|----------------------------------------------------------------------------------|--------------|-----------------|
| 103493120/XP_008451978.1 | 6-phosphogluconate dehydrogenase, decarboxylating 2, chloroplastic(LOC103493120) | Cucumis melo | -1.0763         |
| 103485214/XP_008440953.1 | ATP-dependent 6-phosphofructokinase 2(LOC103485214)                              | Cucumis melo | -1.1856         |
| 103488170/XP_008445000.2 | NADP-dependent malic enzyme(LOC103488170)                                        | Cucumis melo | -0.8914         |
| 103489969/XP_008447551.1 | NADP-dependent malic enzyme(LOC103489969)                                        | Cucumis melo | -0.9623         |
| 103492256/XP_008450776.1 | NADP-dependent malic enzyme(LOC103492256)                                        | Cucumis melo | -0.7131         |
| 103502447/XP_008464603.1 | S-formylglutathione hydrolase(LOC103502447)                                      | Cucumis melo | -0.7331         |
| 103500505/XP_008462041.1 | acetyl-CoA acetyltransferase, cytosolic 1(LOC103500505)                          | Cucumis melo | -1.2583         |
| 103485166/XP_008440877.1 | aconitate hydratase(LOC103485166)                                                | Cucumis melo | -0.6218         |
| 103492249/XP_008450767.2 | cysteine synthase-like(LOC103492249)                                             | Cucumis melo | -1.2556         |
| 103492251/XP_008450770.1 | cysteine synthase-like(LOC103492251)                                             | Cucumis melo | -2.3226         |
| 103487718/XP_008444367.1 | glutamate--glyoxylate aminotransferase 2(LOC103487718)                           | Cucumis melo | -2.4882         |
| 103484230/XP_008439417.1 | glyceraldehyde-3-phosphate dehydrogenase 2, cytosolic(LOC103484230)              | Cucumis melo | -0.9103         |
| 103493832/XP_008452998.1 | glyceraldehyde-3-phosphate dehydrogenase B, chloroplastic(LOC103493832)          | Cucumis melo | -1.7013         |
| 103503632/XP_008466111.1 | phosphoenolpyruvate carboxykinase [ATP](LOC103503632)                            | Cucumis melo | -1.1531         |
| 103491219/XP_008449299.1 | plastidial pyruvate kinase 1, chloroplastic(LOC103491219)                        | Cucumis melo | -0.7581         |
| 103482989/XP_008437645.1 | probable 6-phosphogluconolactonase 4, chloroplastic(LOC103482989)                | Cucumis melo | -0.8031         |

## 4) Ribosome biogenesis in eukaryotes

| ID                       | Gene Name                                                                  | Species      | Log2 FoldChange |
|--------------------------|----------------------------------------------------------------------------|--------------|-----------------|
| 103495169/XP_008454886.1 | H/ACA ribonucleoprotein complex subunit 2-like protein(LOC103495169)       | Cucumis melo | -0.8041         |
| 103491111/XP_008449192.1 | H/ACA ribonucleoprotein complex subunit 4(LOC103491111)                    | Cucumis melo | -1.9299         |
| 103497366/XP_008457746.1 | U3 small nucleolar RNA-associated protein 18 homolog(LOC103497366)         | Cucumis melo | -0.9785         |
| 103500839/XP_008462502.1 | WD repeat-containing protein 3(LOC103500839)                               | Cucumis melo | -1.0910         |
| 103503484/XP_008465906.1 | casein kinase II subunit beta-like(LOC103503484)                           | Cucumis melo | -1.0937         |
| 103484122/XP_008439295.1 | mediator of RNA polymerase II transcription subunit 36a-like(LOC103484122) | Cucumis melo | -1.1570         |
| 103502340/XP_008464470.1 | nucleolar protein 56-like(LOC103502340)                                    | Cucumis melo | -1.1028         |
| 103498805/XP_008459771.1 | nucleolar protein 6(LOC103498805)                                          | Cucumis melo | -2.3495         |
| 103495781/XP_008455669.1 | probable nucleolar protein 5-2(LOC103495781)                               | Cucumis melo | -1.4378         |
| 103490911/XP_008448880.1 | ribosomal RNA small subunit methyltransferase NEP1-like(LOC103490911)      | Cucumis melo | -1.9151         |
| 103494871/XP_008454475.1 | uncharacterized protein At3g06530(LOC103494871)                            | Cucumis melo | -2.9112         |

## 5) Carbon fixation in photosynthetic organisms

| ID                       | Gene Name                                                               | Species      | Log2 FoldChange |
|--------------------------|-------------------------------------------------------------------------|--------------|-----------------|
| 103488170/XP_008445000.2 | NADP-dependent malic enzyme(LOC103488170)                               | Cucumis melo | -0.8914         |
| 103489969/XP_008447551.1 | NADP-dependent malic enzyme(LOC103489969)                               | Cucumis melo | -0.9623         |
| 103492256/XP_008444367.1 | NADP-dependent malic enzyme(LOC103492256)                               | Cucumis melo | -2.4882         |
| 103487718/XP_008444367.1 | glutamate--glyoxylate aminotransferase 2(LOC103487718)                  | Cucumis melo | -2.4882         |
| 103484230/XP_008439417.1 | glyceraldehyde-3-phosphate dehydrogenase 2, cytosolic(LOC103484230)     | Cucumis melo | -0.9103         |
| 103493832/XP_008452998.1 | glyceraldehyde-3-phosphate dehydrogenase B, chloroplastic(LOC103493832) | Cucumis melo | -1.7013         |
| 103503632/XP_008466111.1 | phosphoenolpyruvate carboxykinase [ATP](LOC103503632)                   | Cucumis melo | -1.1531         |

## 6) Pyruvate metabolism

| <b>ID</b>                | <b>Gene Name</b>                                                         | <b>Species</b> | <b>Log2 FoldChange</b> |
|--------------------------|--------------------------------------------------------------------------|----------------|------------------------|
| 103488170/XP_008445000.2 | NADP-dependent malic enzyme(LOC103488170)                                | Cucumis melo   | -0.8914                |
| 103489969/XP_008447551.1 | NADP-dependent malic enzyme(LOC103489969)                                | Cucumis melo   | -0.9623                |
| 103492256/XP_008450776.1 | NADP-dependent malic enzyme(LOC103492256)                                | Cucumis melo   | -0.7131                |
| 103500505/XP_008462041.1 | acetyl-CoA acetyltransferase, cytosolic 1(LOC103500505)                  | Cucumis melo   | -1.2583                |
| 103503632/XP_008466111.1 | phosphoenolpyruvate carboxykinase [ATP](LOC103503632)                    | Cucumis melo   | -1.1531                |
| 103491219/XP_008449299.1 | plastidial pyruvate kinase 1, chloroplastic(LOC103491219)                | Cucumis melo   | -0.7581                |
| 103494619/XP_008454116.1 | probable hydroxyacylglutathione hydrolase 2, chloroplastic(LOC103494619) | Cucumis melo   | -0.9479                |
