# Supplementary material for: Transcriptome profiling of non-climacteric ‘yellow’ melon during ripening: insights on sugar metabolism
Source: PubMed Central journal article supplement (PMC7106763; doi:10.1186/s12864-020-6667-0), 2020-03-30
Supplement: 12864_2020_6667_MOESM8_ESM.pdf [file 12864_2020_6667_MOESM8_ESM.pdf]

## 10 DAP fruit

**Figure S5** 10 DAP fruit network protein interaction (STRING software). The color are represented by functional enrichment in the network (legend). Nodes represent related proteins. Edges represent protein–protein associations.

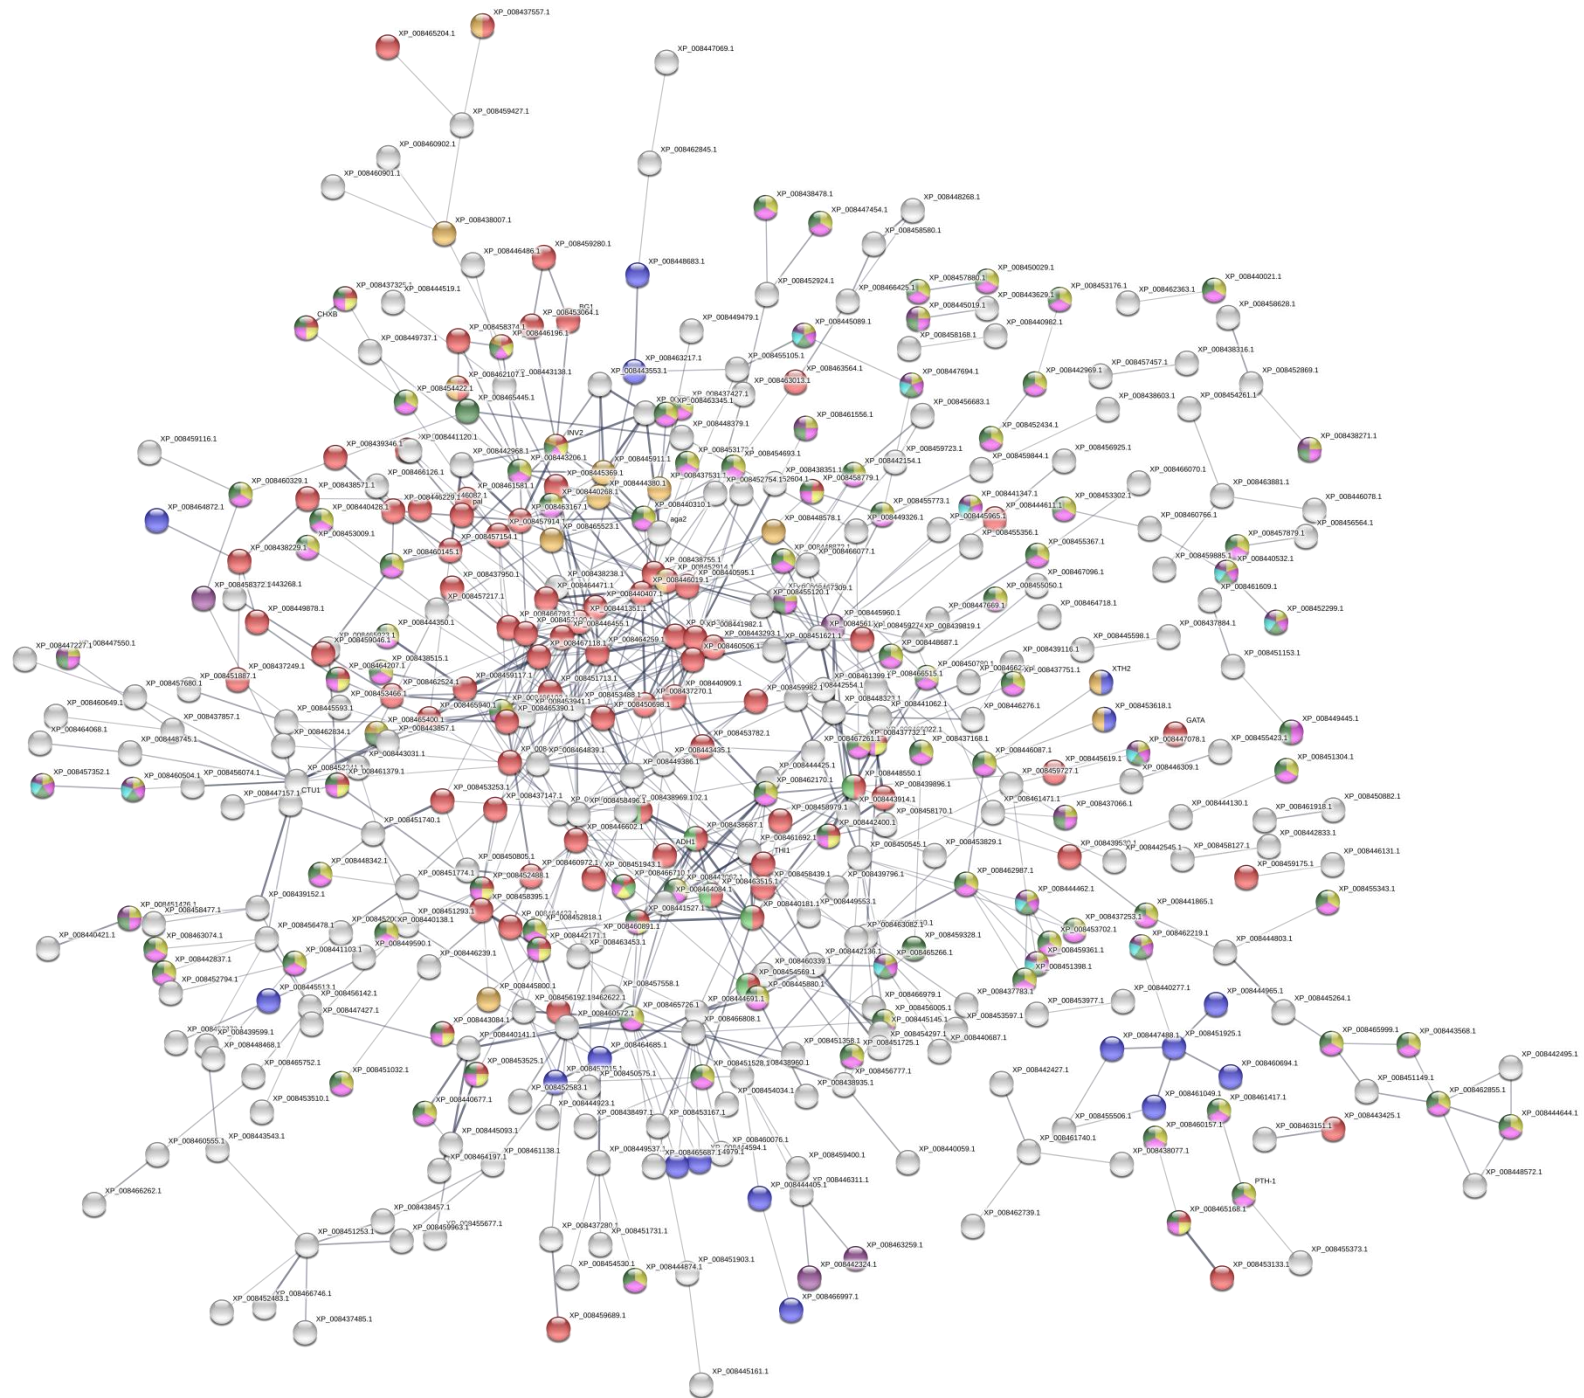

**Legend:**

| KEGG Pathways  |                                   |                          |                             |
|----------------|-----------------------------------|--------------------------|-----------------------------|
| <i>pathway</i> | <i>description</i>                | <i>count in gene set</i> | <i>false discovery rate</i> |
| cmo01100       | Metabolic pathways                | 96 of 1685               | 0.0035                      |
| cmo04075       | Plant hormone signal transduction | 23 of 256                | 0.0095                      |
| cmo00195       | Photosynthesis                    | 7 of 40                  | 0.0427                      |

  

| UniProt Keywords |                     |                          |                             |
|------------------|---------------------|--------------------------|-----------------------------|
| <i>keyword</i>   | <i>description</i>  | <i>count in gene set</i> | <i>false discovery rate</i> |
| KW-1133          | Transmembrane helix | 193 of 3925              | 0.0018                      |
| KW-0812          | Transmembrane       | 196 of 3941              | 0.0018                      |
| KW-0472          | Membrane            | 199 of 4043              | 0.0018                      |
| KW-0406          | Ion transport       | 16 of 134                | 0.0042                      |
| KW-0326          | Glycosidase         | 21 of 224                | 0.0072                      |
| KW-0813          | Transport           | 37 of 538                | 0.0132                      |

**Obs.:** 1 gene of “Metabolic pathways”, 6 genes of “Plant hormone signal transduction”, 88 genes of “Transmembrane helix”, 91 of “Transmembrane”, 91 genes of “membrane”, 3 genes of “Ion transport”, 6 genes of “Glycosidases”, 12 genes of “Transport” are disconnected nodes in the network.

**Table S7** 10 DAP network profile (Cytoscape software)

| Name/Refseq ID | BetweennessCentrality | ClosenessCentrality | Degree | NumberOfDirectedEdges |
|----------------|-----------------------|---------------------|--------|-----------------------|
| XP_008453488.1 | 0.11244542            | 0.28940986          | 26     | 26                    |
| XP_008441351.1 | 0.12321749            | 0.28778135          | 20     | 20                    |
| XP_008464259.1 | 0.09142517            | 0.27816628          | 19     | 19                    |
| XP_008438755.1 | 0.06632325            | 0.26150475          | 15     | 15                    |
| XP_008464839.1 | 0.15539623            | 0.28034456          | 15     | 15                    |
| XP_008467118.1 | 0.03528732            | 0.27286585          | 15     | 15                    |
| XP_008451713.1 | 0.02773533            | 0.27559661          | 13     | 13                    |
| XP_008440181.1 | 0.0235859             | 0.23614776          | 13     | 13                    |
| XP_008452241.1 | 0.14318946            | 0.24706694          | 13     | 13                    |
| XP_008441982.1 | 0.04207467            | 0.25300353          | 13     | 13                    |
| XP_008465726.1 | 0.11418729            | 0.25923244          | 13     | 13                    |
| XP_008456121.1 | 0.07605292            | 0.24320652          | 13     | 13                    |
| XP_008438687.1 | 0.05377935            | 0.26420664          | 12     | 12                    |
| XP_008458506.1 | 0.05832615            | 0.27265804          | 11     | 11                    |
| XP_008458496.1 | 0.04872582            | 0.26169591          | 11     | 11                    |
| XP_008460506.1 | 0.01264813            | 0.25264644          | 11     | 11                    |
| XP_008466808.1 | 0.03713439            | 0.20492272          | 11     | 11                    |
| XP_008441527.1 | 0.04757811            | 0.2443686           | 11     | 11                    |
| XP_008462170.1 | 0.01740133            | 0.24420191          | 11     | 11                    |
| XP_008446602.1 | 0.03979069            | 0.25998548          | 10     | 10                    |
| XP_008443206.1 | 0.06427999            | 0.2405914           | 10     | 10                    |
| XP_008452914.1 | 0.04173978            | 0.24706694          | 10     | 10                    |
| XP_008450545.1 | 0.06334894            | 0.21385902          | 10     | 10                    |
| XP_008464084.1 | 0.02052228            | 0.25175809          | 10     | 10                    |
| XP_008440909.1 | 0.01853812            | 0.26459719          | 9      | 9                     |
| XP_008443435.1 | 0.06345302            | 0.27453988          | 9      | 9                     |
| XP_008463440.1 | 0.05573923            | 0.25211268          | 9      | 9                     |
| XP_008467212.1 | 0.02122836            | 0.20044793          | 9      | 9                     |
| XP_008448550.1 | 0.10639878            | 0.24537354          | 9      | 9                     |
| XP_008460572.1 | 0.04589427            | 0.22759059          | 9      | 9                     |
| XP_008459117.1 | 0.01340061            | 0.25663082          | 9      | 9                     |
| XP_008463167.1 | 0.01510519            | 0.21869273          | 9      | 9                     |
| XP_008465390.1 | 0.02989366            | 0.24189189          | 8      | 8                     |
| XP_008444380.1 | 0.0125398             | 0.22153465          | 8      | 8                     |
| XP_008453782.1 | 0.0239353             | 0.24320652          | 8      | 8                     |
| XP_008446455.1 | 0.00978878            | 0.25626342          | 8      | 8                     |
| XP_008454560.1 | 0.0500793             | 0.22222222          | 8      | 8                     |
| XP_008465940.1 | 0.06163388            | 0.25773938          | 8      | 8                     |
| XP_008452488.1 | 0.05691852            | 0.2306701           | 8      | 8                     |
| XP_008437270.1 | 0.01778418            | 0.24587912          | 8      | 8                     |
| XP_008440595.1 | 0.01089787            | 0.24337186          | 8      | 8                     |
| XP_008452100.1 | 0.03204604            | 0.2573688           | 8      | 8                     |
| XP_008446019.1 | 0.01825703            | 0.23413996          | 8      | 8                     |
| XP_008445911.1 | 0.01368921            | 0.21398685          | 8      | 8                     |
| XP_008463515.1 | 0.01101925            | 0.24843858          | 7      | 7                     |
| XP_008438960.1 | 0.06230861            | 0.22445141          | 7      | 7                     |
| XP_008445960.1 | 0.01479382            | 0.22572509          | 7      | 7                     |

---

|                |            |            |   |   |
|----------------|------------|------------|---|---|
| XP_008448323.1 | 0.02545825 | 0.22904671 | 7 | 7 |
| XP_008461692.1 | 0.00864161 | 0.24403545 | 7 | 7 |
| XP_008444691.1 | 0.02685242 | 0.22759059 | 7 | 7 |
| XP_008457154.1 | 0.02901766 | 0.22759059 | 7 | 7 |
| XP_008460758.1 | 0.01599232 | 0.20123665 | 7 | 7 |
| XP_008438969.1 | 0.02391207 | 0.24403545 | 7 | 7 |
| XP_008442554.1 | 0.06941288 | 0.23429319 | 7 | 7 |
| XP_008452754.1 | 0.05619697 | 0.24554184 | 6 | 6 |
| XP_008451253.1 | 0.01872709 | 0.14111155 | 6 | 6 |
| XP_008442136.1 | 0.0256267  | 0.2201722  | 6 | 6 |
| XP_008450780.1 | 0.02455748 | 0.2039886  | 6 | 6 |
| XP_008441062.1 | 0.02657056 | 0.20492272 | 6 | 6 |
| XP_008440141.1 | 0.03897075 | 0.22222222 | 6 | 6 |
| XP_008464471.1 | 0.00675308 | 0.23007712 | 6 | 6 |
| XP_008449386.1 | 0.01294897 | 0.25626342 | 6 | 6 |
| XP_008443293.1 | 0.01710749 | 0.24965132 | 6 | 6 |
| XP_008437297.1 | 0.00757642 | 0.23583663 | 6 | 6 |
| XP_008465523.1 | 0.01510251 | 0.22194668 | 6 | 6 |
| XP_008444462.1 | 0.00821639 | 0.18340164 | 6 | 6 |
| XP_008451774.1 | 0.03132797 | 0.22459222 | 6 | 6 |
| XP_008442171.1 | 0.02244632 | 0.2201722  | 6 | 6 |
| XP_008464685.1 | 0.0370183  | 0.2144997  | 6 | 6 |
| XP_008466022.1 | 0.01976409 | 0.21021726 | 6 | 6 |
| XP_008440407.1 | 0.00738425 | 0.23126615 | 6 | 6 |
| XP_008440310.1 | 0.02380382 | 0.23537147 | 6 | 6 |
| XP_008448578.1 | 0.02059592 | 0.22658228 | 5 | 5 |
| XP_008466793.1 | 0.00683113 | 0.25300353 | 5 | 5 |
| XP_008459274.1 | 0.01169887 | 0.2169697  | 5 | 5 |
| XP_008460972.1 | 0.0183405  | 0.22153465 | 5 | 5 |
| XP_008451925.1 | 0.83333333 | 0.85714286 | 5 | 5 |
| XP_008456478.1 | 0.03758571 | 0.20681687 | 5 | 5 |
| XP_008459727.1 | 0.02066464 | 0.19648738 | 5 | 5 |
| XP_008466077.1 | 0.0168034  | 0.23946488 | 5 | 5 |
| XP_008451468.1 | 1.12E+00   | 0.18921776 | 5 | 5 |
| XP_008442400.1 | 0.00547248 | 0.19757174 | 5 | 5 |
| XP_008462855.1 | 0.01668153 | 0.09293873 | 5 | 5 |
| XP_008462987.1 | 0.01438425 | 0.19288793 | 5 | 5 |
| XP_008462524.1 | 0.03410722 | 0.25034965 | 5 | 5 |
| XP_008453941.1 | 0.00100177 | 0.24965132 | 5 | 5 |
| XP_008456142.1 | 0.0311242  | 0.1967033  | 5 | 5 |
| XP_008450698.1 | 0.00382152 | 0.23708609 | 5 | 5 |
| XP_008461471.1 | 0.02471887 | 0.19833795 | 5 | 5 |
| XP_008466102.1 | 0.01755255 | 0.20515759 | 4 | 4 |
| XP_008457914.1 | 0.01779578 | 0.22071517 | 4 | 4 |
| XP_008445880.1 | 0.01113387 | 0.22126082 | 4 | 4 |
| XP_008456777.1 | 0.00558659 | 0.18368394 | 4 | 4 |
| XP_008445369.1 | 0.01766872 | 0.23661599 | 4 | 4 |
| XP_008441802.1 | 0.00246951 | 0.24554184 | 4 | 4 |
| XP_008456192.1 | 0.01410017 | 0.23111685 | 4 | 4 |

---

|                |            |            |   |   |
|----------------|------------|------------|---|---|
| XP_008443062.1 | 0.00830748 | 0.22403004 | 4 | 4 |
| XP_008439152.1 | 0.02297644 | 0.20504009 | 4 | 4 |
| XP_008443914.1 | 0.00290622 | 0.21909425 | 4 | 4 |
| XP_008438007.1 | 0.02772953 | 0.16429555 | 4 | 4 |
| XP_008451740.1 | 0.00463293 | 0.1967033  | 4 | 4 |
| XP_008443553.1 | 1.79E-02   | 0.18558839 | 4 | 4 |
| XP_008449537.1 | 0.01671283 | 0.17722772 | 4 | 4 |
| XP_008458395.1 | 0.00893971 | 0.22788033 | 4 | 4 |
| XP_008460145.1 | 0.00409463 | 0.19498911 | 4 | 4 |
| XP_008438229.1 | 0.00686508 | 0.17211538 | 4 | 4 |
| XP_008446087.1 | 0.01862769 | 0.2037564  | 4 | 4 |
| XP_008443031.1 | 0.01772099 | 0.21083628 | 4 | 4 |
| XP_008457015.1 | 0.03580261 | 0.21233689 | 4 | 4 |
| XP_008446229.1 | 0.00558659 | 0.19299191 | 4 | 4 |
| XP_008453253.1 | 0.00779374 | 0.21644498 | 4 | 4 |
| XP_008445093.1 | 0.00558659 | 0.1821883  | 3 | 3 |
| XP_008455120.1 | 0.00784645 | 0.22319202 | 3 | 3 |
| XP_008461740.1 | 1          | 1          | 3 | 3 |
| XP_008439896.1 | 0          | 0.17687747 | 3 | 3 |
| XP_008461491.1 | 0.00669022 | 0.23307292 | 3 | 3 |
| XP_008442968.1 | 0          | 0.19467102 | 3 | 3 |
| XP_008437857.1 | 0.01115754 | 0.19866815 | 3 | 3 |
| XP_008459427.1 | 0.01115754 | 0.14139021 | 3 | 3 |
| XP_008442154.1 | 0.00242505 | 0.18321392 | 3 | 3 |
| XP_008461138.1 | 0.02329975 | 0.17687747 | 3 | 3 |
| XP_008461379.1 | 0.00851987 | 0.19012215 | 3 | 3 |
| XP_008446311.1 | 0.01115754 | 0.18377823 | 3 | 3 |
| XP_008444803.1 | 0.04927781 | 0.14517437 | 3 | 3 |
| XP_008456005.1 | 0          | 0.18358974 | 3 | 3 |
| XP_008458170.1 | 0          | 0.17687747 | 3 | 3 |
| XP_008460329.1 | 0.01061239 | 0.16886792 | 3 | 3 |
| XP_008441103.1 | 0.01115754 | 0.18387262 | 3 | 3 |
| XP_008452604.1 | 0          | 0.20911215 | 3 | 3 |
| XP_008455105.1 | 0.00653831 | 0.20899008 | 3 | 3 |
| XP_008453167.1 | 0.01114189 | 0.17687747 | 3 | 3 |
| XP_008438238.1 | 0.00558659 | 0.17935872 | 3 | 3 |
| XP_008443138.1 | 0.01115754 | 0.19185423 | 3 | 3 |
| XP_008465999.1 | 0.03305792 | 0.11350666 | 3 | 3 |
| XP_008466425.1 | 0.01114189 | 0.16558742 | 3 | 3 |
| XP_008463217.1 | 0.01790507 | 0.22529893 | 3 | 3 |
| XP_008451358.1 | 0.00825932 | 0.21579265 | 3 | 3 |
| XP_008460891.1 | 0.00863946 | 0.21385902 | 3 | 3 |
| XP_008451293.1 | 0.01097107 | 0.20011179 | 3 | 3 |
| XP_008457558.1 | 0.01023284 | 0.19637959 | 3 | 3 |
| XP_008455773.1 | 0.00608447 | 0.2085032  | 3 | 3 |
| XP_008462622.1 | 0.00663791 | 0.20123665 | 3 | 3 |
| XP_008452924.1 | 0.01115754 | 0.16558742 | 3 | 3 |
| XP_008451621.1 | 0.00181765 | 0.21083628 | 3 | 3 |
| XP_008463881.1 | 1          | 1          | 3 | 3 |

---

|                |            |            |   |   |
|----------------|------------|------------|---|---|
| XP_008464423.1 | 0.00332518 | 0.20457143 | 3 | 3 |
| XP_008459982.1 | 0.00488477 | 0.24982554 | 3 | 3 |
| XP_008439530.1 | 0.07052877 | 0.2        | 3 | 3 |
| XP_008445593.1 | 0.00851811 | 0.19691969 | 3 | 3 |
| XP_008454422.1 | 0.01114189 | 0.18126582 | 3 | 3 |
| XP_008458439.1 | 0.02464458 | 0.23568137 | 3 | 3 |
| XP_008449326.1 | 0.01799764 | 0.17740337 | 3 | 3 |
| XP_008454458.1 | 0.00784645 | 0.22319202 | 3 | 3 |
| XP_008458374.1 | 5.48E-02   | 0.19488296 | 3 | 3 |
| XP_008466710.1 | 7.94E+00   | 0.22759059 | 3 | 3 |
| XP_008461581.1 | 0.01246501 | 0.23307292 | 3 | 3 |
| XP_008444644.1 | 7.82E-06   | 0.08509627 | 3 | 3 |
| XP_008446196.1 | 0.03305009 | 0.19541485 | 3 | 3 |
| XP_008467309.1 | 0.00367952 | 0.18209563 | 2 | 2 |
| XP_008465687.1 | 0.00261573 | 0.2146283  | 2 | 2 |
| XP_008451528.1 | 0.00115098 | 0.19340897 | 2 | 2 |
| XP_008448687.1 | 0.00558659 | 0.19012215 | 2 | 2 |
| XP_008459963.1 | 0.00676904 | 0.15331906 | 2 | 2 |
| XP_008448872.1 | 1.44E+00   | 0.21046443 | 2 | 2 |
| XP_008458979.1 | 8.45E+00   | 0.20789779 | 2 | 2 |
| XP_008447669.1 | 0.01114189 | 0.1903243  | 2 | 2 |
| XP_008445619.1 | 0.00558659 | 0.19735391 | 2 | 2 |
| XP_008459361.1 | 7.90E+00   | 0.17429406 | 2 | 2 |
| XP_008454979.1 | 0.00261573 | 0.2146283  | 2 | 2 |
| XP_008460504.1 | 0.00558659 | 0.19844789 | 2 | 2 |
| XP_008444425.1 | 0.0019317  | 0.20960187 | 2 | 2 |
| XP_008464207.1 | 0.00648971 | 0.20610248 | 2 | 2 |
| XP_008460766.1 | 0.6666667  | 0.75       | 2 | 2 |
| XP_008463013.1 | 0.01666588 | 0.19789939 | 2 | 2 |
| XP_008459844.1 | 0.00558659 | 0.15086389 | 2 | 2 |
| XP_008450452.1 | 0.00278547 | 0.16721158 | 2 | 2 |
| XP_008455506.1 | 0.03333333 | 0.46153846 | 2 | 2 |
| XP_008459723.1 | 0.00348815 | 0.19467102 | 2 | 2 |
| XP_008459328.1 | 0.00183668 | 0.18626431 | 2 | 2 |
| XP_008463969.1 | 0.00558659 | 0.2180268  | 2 | 2 |
| XP_008438571.1 | 0.00738796 | 0.19083156 | 2 | 2 |
| XP_008465752.1 | 0.01114189 | 0.16474919 | 2 | 2 |
| XP_008440677.1 | 0          | 0.18209563 | 2 | 2 |
| XP_008466979.1 | 0.00103928 | 0.18340164 | 2 | 2 |
| XP_008446276.1 | 0          | 0.170233   | 2 | 2 |
| XP_008442969.1 | 1          | 1          | 2 | 2 |
| XP_008438497.1 | 6.18E+00   | 0.1919571  | 2 | 2 |
| XP_008451398.1 | 7.90E+00   | 0.17429406 | 2 | 2 |
| XP_008437253.1 | 0          | 0.1773155  | 2 | 2 |
| XP_008453064.1 | 0.00278547 | 0.16721158 | 2 | 2 |
| XP_008465445.1 | 0.00187508 | 0.15150233 | 2 | 2 |
| XP_008446309.1 | 0.00558659 | 0.16574074 | 2 | 2 |
| XP_008440532.1 | 0.6666667  | 0.75       | 2 | 2 |
| XP_008466520.1 | 0          | 0.22388993 | 2 | 2 |

---

|                |            |            |   |   |
|----------------|------------|------------|---|---|
| XP_008444130.1 | 0.00558659 | 0.16689977 | 2 | 2 |
| XP_008444405.1 | 0.00558659 | 0.18358974 | 2 | 2 |
| XP_008443568.1 | 0.01104799 | 0.10219812 | 2 | 2 |
| XP_008448379.1 | 0.00242023 | 0.15417743 | 2 | 2 |
| XP_008457217.1 | 0.00379475 | 0.19988833 | 2 | 2 |
| XP_008448683.1 | 0.01114189 | 0.18434604 | 2 | 2 |
| XP_008462845.1 | 0.00558659 | 0.15585546 | 2 | 2 |
| XP_008457680.1 | 0.00558659 | 0.19844789 | 2 | 2 |
| XP_008460339.1 | 0.00173466 | 0.19616438 | 2 | 2 |
| XP_008448268.1 | 0          | 0.14217633 | 2 | 2 |
| XP_008449878.1 | 0.00140084 | 0.17269658 | 2 | 2 |
| XP_008443543.1 | 0.01060086 | 0.15105485 | 2 | 2 |
| XP_008442495.1 | 0          | 0.08507605 | 2 | 2 |
| XP_008451903.1 | 0.00558659 | 0.1504834  | 2 | 2 |
| XP_008452869.1 | 1          | 1          | 2 | 2 |
| XP_008456683.1 | 3.53E+00   | 0.16918715 | 2 | 2 |
| XP_008459046.1 | 0.00558659 | 0.20056022 | 2 | 2 |
| XP_008437732.1 | 0          | 0.19757174 | 2 | 2 |
| XP_008451149.1 | 0.01104799 | 0.10219812 | 2 | 2 |
| XP_008454693.1 | 8.05E+00   | 0.205393   | 2 | 2 |
| XP_008444594.1 | 0.00261573 | 0.2146283  | 2 | 2 |
| XP_008460076.1 | 0.00261573 | 0.2146283  | 2 | 2 |
| XP_008439286.1 | 0          | 0.15358215 | 2 | 2 |
| XP_008447488.1 | 0.13333333 | 0.6        | 2 | 2 |
| XP_008465266.1 | 0.00738734 | 0.19746277 | 2 | 2 |
| XP_008447694.1 | 7.62E+00   | 0.1752325  | 2 | 2 |
| XP_008438457.1 | 0.00676904 | 0.15331906 | 2 | 2 |
| XP_008465168.1 | 1          | 1          | 2 | 2 |
| XP_008445513.1 | 0.00558659 | 0.15840708 | 2 | 2 |
| XP_008441865.1 | 0.05445754 | 0.16831218 | 2 | 2 |
| XP_008437066.1 | 0.00568282 | 0.18008048 | 2 | 2 |
| XP_008446239.1 | 0.00558659 | 0.20669746 | 2 | 2 |
| XP_008461049.1 | 0.13333333 | 0.6        | 2 | 2 |
| XP_008448572.1 | 0          | 0.08507605 | 2 | 2 |
| XP_008445264.1 | 0.0384489  | 0.12744749 | 2 | 2 |
| XP_008448342.1 | 0          | 0.18665276 | 2 | 2 |
| XP_008449590.1 | 0.01114189 | 0.18792651 | 2 | 2 |
| XP_008460555.1 | 0.00558659 | 0.14161392 | 2 | 2 |
| XP_008445303.1 | 4.30E+00   | 0.17228104 | 2 | 2 |
| XP_008437325.1 | 0          | 0.15358215 | 2 | 2 |
| XP_008463564.1 | 0.01666588 | 0.19789939 | 2 | 2 |
| XP_008437280.1 | 0.00558659 | 0.18568465 | 2 | 2 |
| XP_008453525.1 | 0.00558659 | 0.18071681 | 2 | 2 |
| XP_008445089.1 | 8.34E+00   | 0.1761811  | 2 | 2 |
| XP_008452818.1 | 0          | 0.21670702 | 2 | 2 |
| XP_008458779.1 | 0.00437573 | 0.22948718 | 2 | 2 |
| XP_008445800.1 | 0.00107708 | 0.19988833 | 2 | 2 |
| XP_008458372.1 | 0.01511504 | 0.1994429  | 2 | 2 |
| XP_008439116.1 | 0          | 0.170233   | 2 | 2 |

---

|                |            |            |   |   |
|----------------|------------|------------|---|---|
| XP_008437249.1 | 0.0035429  | 0.17600787 | 2 | 2 |
| XP_008437531.1 | 0.00558659 | 0.19002123 | 2 | 2 |
| XP_008462107.1 | 0          | 0.19414317 | 2 | 2 |
| XP_008463453.1 | 0.00212988 | 0.20527523 | 2 | 2 |
| XP_008439599.1 | 0.01516219 | 0.17286335 | 2 | 2 |
| XP_008444611.1 | 0.00558659 | 0.19594964 | 2 | 2 |
| XP_008465923.1 | 0.00128301 | 0.17303045 | 2 | 2 |
| XP_008451426.1 | 0.00558659 | 0.17039505 | 2 | 2 |
| XP_008455367.1 | 0.00558659 | 0.16010733 | 2 | 2 |
| XP_008437168.1 | 0.00214761 | 0.18931782 | 2 | 2 |
| XP_008453702.1 | 7.90E+00   | 0.17429406 | 2 | 2 |
| XP_008448745.1 | 0.00558659 | 0.19844789 | 2 | 2 |
| XP_008466515.1 | 3.26E+00   | 0.19175147 | 2 | 2 |
| XP_008451153.1 | 1          | 1          | 2 | 2 |
| XP_008459280.1 | 7.82E-06   | 0.14342949 | 2 | 2 |
| XP_008443857.1 | 0.00163421 | 0.22963438 | 2 | 2 |
| XP_008450575.1 | 0          | 0.19320022 | 2 | 2 |
| XP_008458580.1 | 0          | 0.14217633 | 2 | 2 |
| XP_008465055.1 | 1          | 1          | 2 | 2 |
| XP_008437147.1 | 0.00948805 | 0.22701332 | 2 | 2 |
| XP_008450805.1 | 2.34E+00   | 0.19257665 | 2 | 2 |
| XP_008439819.1 | 0.01014352 | 0.20777713 | 2 | 2 |
| XP_008461217.1 | 0          | 0.17908954 | 1 | 1 |
| XP_008445598.1 | 0          | 1          | 1 | 1 |
| XP_008465204.1 | 0          | 0.12391831 | 1 | 1 |
| XP_008461556.1 | 0          | 0.2020316  | 1 | 1 |
| XP_008455373.1 | 0          | 0.66666667 | 1 | 1 |
| XP_008447427.1 | 0          | 0.16682199 | 1 | 1 |
| XP_008461918.1 | 0          | 1          | 1 | 1 |
| XP_008451943.1 | 0          | 0.19627193 | 1 | 1 |
| XP_008448468.1 | 0          | 0.15538194 | 1 | 1 |
| XP_008453829.1 | 0          | 0.19637959 | 1 | 1 |
| XP_008465400.1 | 0          | 0.17031399 | 1 | 1 |
| XP_008438603.1 | 0          | 0.13113553 | 1 | 1 |
| XP_008451725.1 | 0          | 0.19113721 | 1 | 1 |
| XP_008464197.1 | 0          | 0.15312233 | 1 | 1 |
| XP_008438351.1 | 0          | 0.2020316  | 1 | 1 |
| XP_008456074.1 | 0          | 0.19822813 | 1 | 1 |
| XP_008466126.1 | 0          | 0.2144997  | 1 | 1 |
| XP_008441347.1 | 0          | 0.19573537 | 1 | 1 |
| XP_008459175.1 | 0          | 1          | 1 | 1 |
| XP_008457880.1 | 0          | 1          | 1 | 1 |
| XP_008466070.1 | 0          | 0.13806402 | 1 | 1 |
| XP_008447078.1 | 0          | 0.16429555 | 1 | 1 |
| XP_008458628.1 | 0          | 0.66666667 | 1 | 1 |
| XP_008453009.1 | 0          | 0.22459222 | 1 | 1 |
| XP_008457457.1 | 0          | 1          | 1 | 1 |
| XP_008453466.1 | 0          | 0.21909425 | 1 | 1 |
| XP_008462739.1 | 0          | 0.6        | 1 | 1 |

---



|                |   |            |   |   |
|----------------|---|------------|---|---|
| XP_008453172.1 | 0 | 0.18981972 | 1 | 1 |
| XP_008437485.1 | 0 | 0.12370422 | 1 | 1 |
| XP_008450029.1 | 0 | 1          | 1 | 1 |
| XP_008447069.1 | 0 | 0.13489073 | 1 | 1 |
| XP_008458168.1 | 0 | 1          | 1 | 1 |
| XP_008440687.1 | 0 | 0.18191057 | 1 | 1 |
| XP_008453621.1 | 0 | 0.16934721 | 1 | 1 |
| XP_008440021.1 | 0 | 1          | 1 | 1 |
| XP_008440982.1 | 0 | 1          | 1 | 1 |
| XP_008453597.1 | 0 | 0.18191057 | 1 | 1 |
| XP_008442837.1 | 0 | 0.17145594 | 1 | 1 |
| XP_008446131.1 | 0 | 1          | 1 | 1 |
| XP_008449505.1 | 0 | 0.16490097 | 1 | 1 |
| XP_008454530.1 | 0 | 0.15061001 | 1 | 1 |
| XP_008454034.1 | 0 | 0.18549223 | 1 | 1 |
| XP_008458127.1 | 0 | 1          | 1 | 1 |
| XP_008461609.1 | 0 | 0.66666667 | 1 | 1 |
| XP_008452483.1 | 0 | 0.12370422 | 1 | 1 |
| XP_008452299.1 | 0 | 0.5        | 1 | 1 |
| XP_008462834.1 | 0 | 0.21437126 | 1 | 1 |
| XP_008463345.1 | 0 | 0.20741599 | 1 | 1 |
| XP_008443425.1 | 0 | 1          | 1 | 1 |
| XP_008467261.1 | 0 | 0.19573537 | 1 | 1 |
| XP_008445161.1 | 0 | 0.13084795 | 1 | 1 |
| XP_008462363.1 | 0 | 1          | 1 | 1 |
| XP_008456925.1 | 0 | 0.16391941 | 1 | 1 |
| XP_008456564.1 | 0 | 1          | 1 | 1 |
| XP_008463082.1 | 0 | 0.20146314 | 1 | 1 |
| XP_008463259.1 | 0 | 0.15531453 | 1 | 1 |
| XP_008444350.1 | 0 | 0.2043379  | 1 | 1 |
| XP_008455677.1 | 0 | 0.15417743 | 1 | 1 |
| XP_008440428.1 | 0 | 0.22459222 | 1 | 1 |
| XP_008464068.1 | 0 | 0.16566404 | 1 | 1 |
| XP_008442427.1 | 0 | 0.6        | 1 | 1 |
| XP_008458477.1 | 0 | 0.170233   | 1 | 1 |
| XP_008460649.1 | 0 | 0.16581751 | 1 | 1 |
| XP_008444923.1 | 0 | 0.18549223 | 1 | 1 |
| XP_008443084.1 | 0 | 0.18053454 | 1 | 1 |
| XP_008452372.1 | 0 | 0.13679786 | 1 | 1 |
| XP_008457879.1 | 0 | 1          | 1 | 1 |
| XP_008453510.1 | 0 | 0.16444649 | 1 | 1 |
| XP_008445019.1 | 0 | 1          | 1 | 1 |
| XP_008446486.1 | 0 | 0.16104363 | 1 | 1 |
| XP_008449737.1 | 0 | 0.19403794 | 1 | 1 |
| XP_008455050.1 | 0 | 0.15982143 | 1 | 1 |
| XP_008438478.1 | 0 | 0.14211989 | 1 | 1 |
| XP_008453302.1 | 0 | 0.5        | 1 | 1 |
| XP_008442833.1 | 0 | 1          | 1 | 1 |
| XP_008437427.1 | 0 | 0.19062833 | 1 | 1 |

---

|                |   |            |   |   |
|----------------|---|------------|---|---|
| XP_008440268.1 | 0 | 0.18792651 | 1 | 1 |
| XP_008454569.1 | 0 | 0.19911012 | 1 | 1 |
| XP_008444519.1 | 0 | 0.16104363 | 1 | 1 |
| XP_008442545.1 | 0 | 0.16558742 | 1 | 1 |
| XP_008441120.1 | 0 | 0.1521462  | 1 | 1 |
| XP_008437557.1 | 0 | 0.12391831 | 1 | 1 |
| XP_008453133.1 | 0 | 0.66666667 | 1 | 1 |
| XP_008464718.1 | 0 | 0.16950758 | 1 | 1 |
| XP_008437950.1 | 0 | 0.2144997  | 1 | 1 |
| XP_008453977.1 | 0 | 1          | 1 | 1 |
| XP_008460902.1 | 0 | 0.14116719 | 1 | 1 |
| XP_008447550.1 | 0 | 0.16581751 | 1 | 1 |
| XP_008466997.1 | 0 | 0.15517989 | 1 | 1 |
| XP_008463074.1 | 0 | 0.17145594 | 1 | 1 |
| XP_008452794.1 | 0 | 0.15538194 | 1 | 1 |
| XP_008452583.1 | 0 | 0.18549223 | 1 | 1 |
| XP_008444965.1 | 0 | 0.5        | 1 | 1 |
| XP_008455356.1 | 0 | 0.17837569 | 1 | 1 |
| XP_008437884.1 | 0 | 1          | 1 | 1 |
| XP_008455423.1 | 0 | 0.14223282 | 1 | 1 |
| XP_008460694.1 | 0 | 0.5        | 1 | 1 |
| XP_008454297.1 | 0 | 0.18053454 | 1 | 1 |
| XP_008460901.1 | 0 | 0.14116719 | 1 | 1 |
| XP_008462219.1 | 0 | 0.5        | 1 | 1 |
| XP_008440138.1 | 0 | 0.18753274 | 1 | 1 |
| XP_008466228.1 | 0 | 0.17015209 | 1 | 1 |
| XP_008445965.1 | 0 | 0.18425116 | 1 | 1 |
| XP_008437751.1 | 0 | 0.17378641 | 1 | 1 |
| XP_008451304.1 | 0 | 0.14308553 | 1 | 1 |
| XP_008443268.1 | 0 | 0.16713352 | 1 | 1 |
| XP_008446082.1 | 0 | 0.18714062 | 1 | 1 |
| XP_008457352.1 | 0 | 0.16566404 | 1 | 1 |
| XP_008467096.1 | 0 | 0.16950758 | 1 | 1 |
| XP_008454261.1 | 0 | 0.6        | 1 | 1 |
| XP_008463151.1 | 0 | 1          | 1 | 1 |
| XP_008438935.1 | 0 | 0.18126582 | 1 | 1 |
| XP_008461399.1 | 0 | 0.19573537 | 1 | 1 |
| XP_008447227.1 | 0 | 0.16566404 | 1 | 1 |
| XP_008453618.1 | 0 | 0.16934721 | 1 | 1 |
| XP_008439346.1 | 0 | 0.16184448 | 1 | 1 |
| XP_008446078.1 | 0 | 0.6        | 1 | 1 |
| XP_008438316.1 | 0 | 1          | 1 | 1 |
| XP_008464872.1 | 0 | 0.14690193 | 1 | 1 |
| XP_008451731.1 | 0 | 0.15061001 | 1 | 1 |
| XP_008455343.1 | 0 | 0.12681544 | 1 | 1 |
| XP_008459689.1 | 0 | 0.15667396 | 1 | 1 |
| XP_008440421.1 | 0 | 0.14564687 | 1 | 1 |
| XP_008452434.1 | 0 | 0.66666667 | 1 | 1 |
| XP_008466746.1 | 0 | 0.12370422 | 1 | 1 |

---

|                |   |            |   |   |
|----------------|---|------------|---|---|
| XP_008451887.1 | 0 | 0.1645977  | 1 | 1 |
| XP_008442324.1 | 0 | 0.15531453 | 1 | 1 |
| XP_008451032.1 | 0 | 0.17137386 | 1 | 1 |
| XP_008450882.1 | 0 | 1          | 1 | 1 |
| XP_008443629.1 | 0 | 1          | 1 | 1 |
| XP_008447157.1 | 0 | 0.15982143 | 1 | 1 |
| XP_008460157.1 | 0 | 0.66666667 | 1 | 1 |
| XP_008440277.1 | 0 | 1          | 1 | 1 |
| XP_008449553.1 | 0 | 0.20146314 | 1 | 1 |
| XP_008438271.1 | 0 | 0.66666667 | 1 | 1 |
| XP_008453176.1 | 0 | 0.66666667 | 1 | 1 |
| XP_008452006.1 | 0 | 0.18349564 | 1 | 1 |
| XP_008466262.1 | 0 | 0.12409012 | 1 | 1 |
| XP_008440059.1 | 0 | 0.15524718 | 1 | 1 |
| XP_008459885.1 | 0 | 0.6        | 1 | 1 |
| XP_008449479.1 | 0 | 0.15975011 | 1 | 1 |
| XP_008459400.1 | 0 | 0.18340164 | 1 | 1 |
| XP_008439796.1 | 0 | 0.20146314 | 1 | 1 |
| XP_008459116.1 | 0 | 0.14452967 | 1 | 1 |
| XP_008437783.1 | 0 | 0.18191057 | 1 | 1 |
| XP_008449445.1 | 0 | 0.66666667 | 1 | 1 |
| XP_008445145.1 | 0 | 0.19113721 | 1 | 1 |
| XP_008461417.1 | 0 | 0.66666667 | 1 | 1 |
| XP_008438077.1 | 0 | 0.6        | 1 | 1 |
| XP_008438515.1 | 0 | 0.2043379  | 1 | 1 |
| XP_008444874.1 | 0 | 0.15061001 | 1 | 1 |
| XP_008447454.1 | 0 | 0.14211989 | 1 | 1 |

## 40 DAP fruit

**Figure S6** 40 DAP fruit network protein interaction (STRING software). The color are represented by functional enrichment in the network (legend). Nodes represent related proteins. Edges represent protein–protein associations.

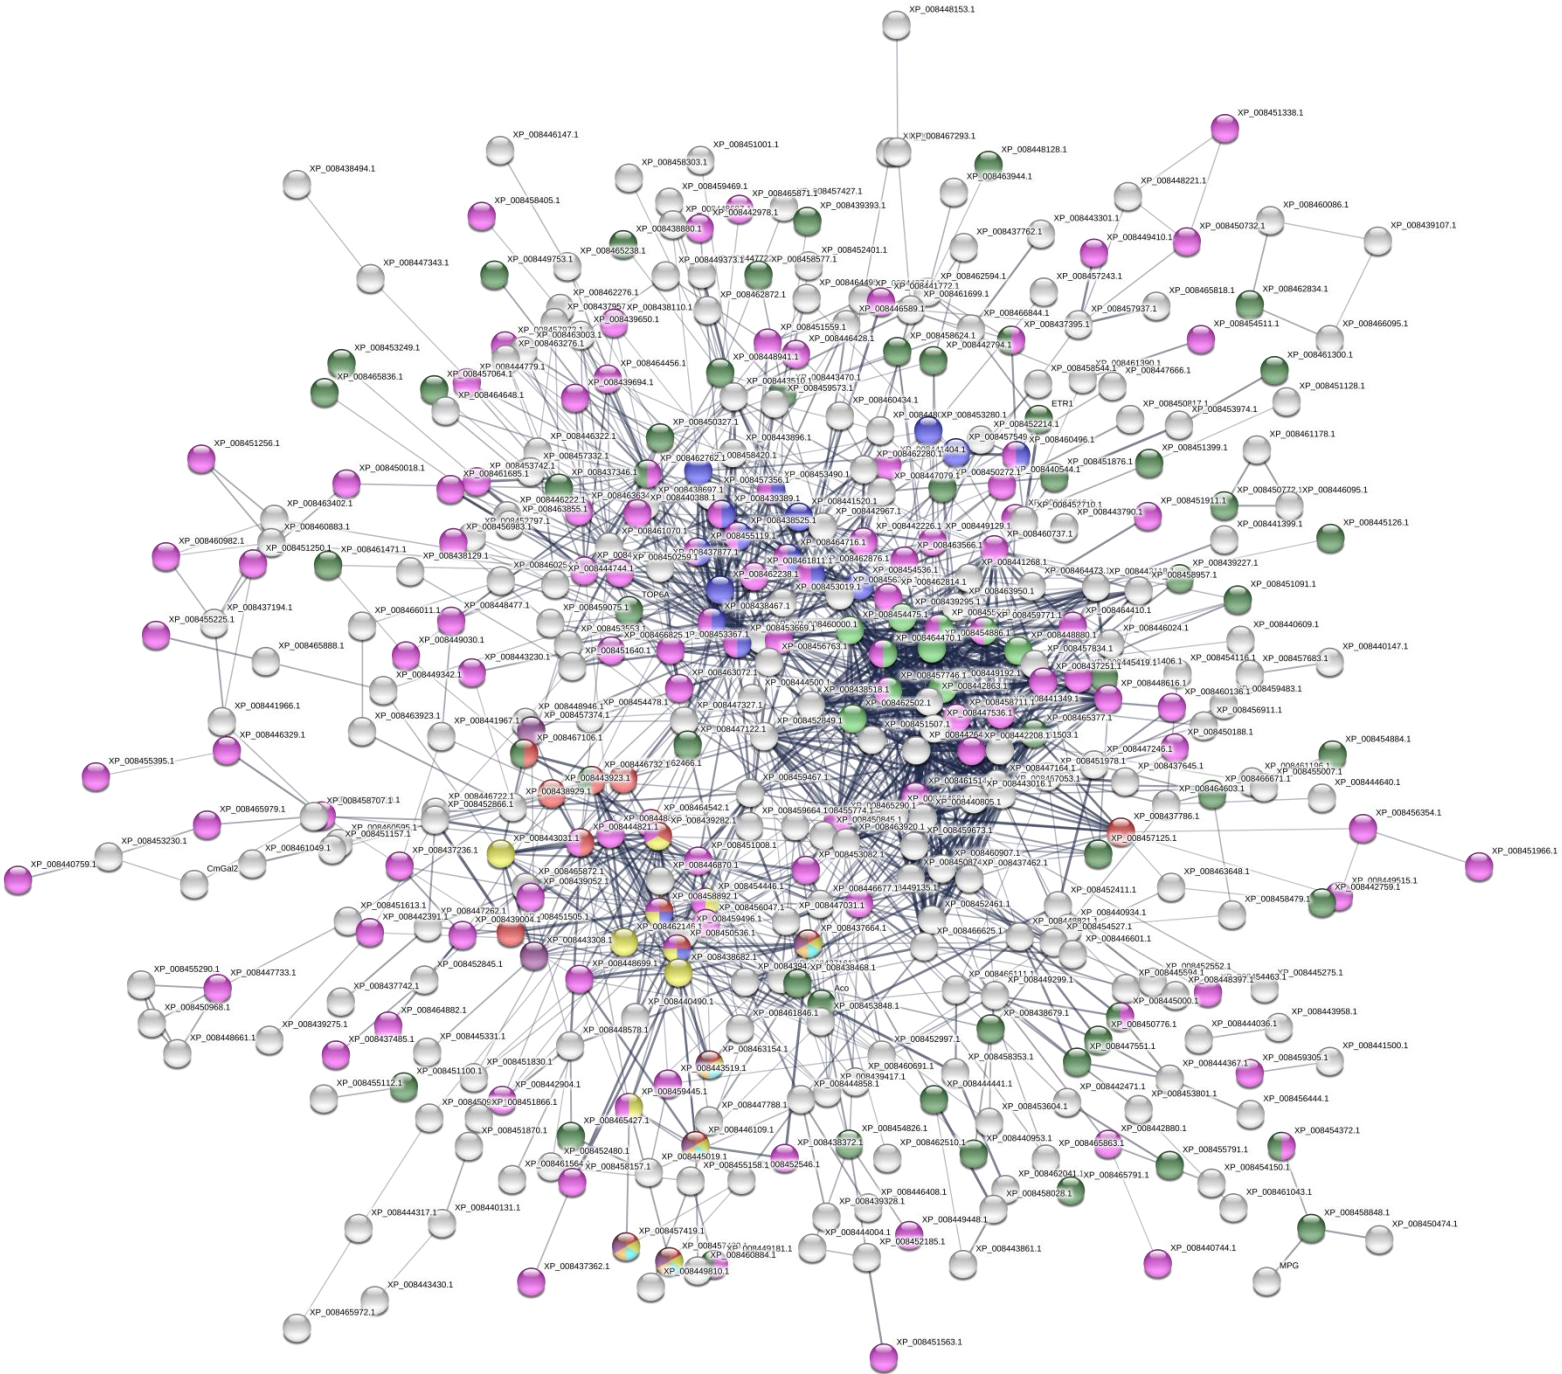

**Legend:**

| KEGG Pathways  |                                             |                          |                                                                                             |
|----------------|---------------------------------------------|--------------------------|---------------------------------------------------------------------------------------------|
| <i>pathway</i> | <i>description</i>                          | <i>count in gene set</i> | <i>false discovery rate</i>                                                                 |
| cmo04141       | Protein processing in endoplasmic reticulum | 21 of 168                | 0.00081  |
| cmo03040       | Spliceosome                                 | 17 of 150                | 0.0083   |
| cmo03008       | Ribosome biogenesis in eukaryotes           | 10 of 75                 | 0.0382   |

  

| UniProt Keywords |                    |                          |                                                                                              |
|------------------|--------------------|--------------------------|----------------------------------------------------------------------------------------------|
| <i>keyword</i>   | <i>description</i> | <i>count in gene set</i> | <i>false discovery rate</i>                                                                  |
| KW-0346          | Stress response    | 17 of 52                 | 7.39e-08  |
| KW-0175          | Coiled coil        | 179 of 3077              | 2.59e-06  |
| KW-0479          | Metal-binding      | 91 of 1662               | 0.0482    |

  

| PFAM Protein Domains |                               |                          |                                                                                            |
|----------------------|-------------------------------|--------------------------|--------------------------------------------------------------------------------------------|
| <i>domain</i>        | <i>description</i>            | <i>count in gene set</i> | <i>false discovery rate</i>                                                                |
| PF00011              | Hsp20/alpha crystallin family | 9 of 35                  | 0.0210  |

  

| INTERPRO Protein Domains and Features |                                |                          |                                                                                            |
|---------------------------------------|--------------------------------|--------------------------|--------------------------------------------------------------------------------------------|
| <i>domain</i>                         | <i>description</i>             | <i>count in gene set</i> | <i>false discovery rate</i>                                                                |
| IPR031107                             | Small heat shock protein HSP20 | 9 of 25                  | 0.0036  |
| IPR008978                             | HSP20-like chaperone           | 11 of 47                 | 0.0050  |
| IPR002068                             | Alpha crystallin/Hsp20 domain  | 9 of 35                  | 0.0117  |

**Obs.:** 3 genes of “Protein processing in endoplasmic reticulum”, 1 gene of “Stress response”, 61 genes of “Coiled coil”, 36 of “Metal binding”, 2 genes of “Hps20/alpha crystalline family”, 2 genes of “Small heat shock protein HSP20”, 2 genes of “HSP20-like chaperone”, 2 genes of “Alpha crystalline/Hsp20 domain” are disconnected nodes in the network.

**Table S8** 40 DAP network profile (Cytoscape software)

| Name/RefseqID  | BetweennessCentrality | ClosenessCentrality | Degree | NumberOfDirectedEdges |
|----------------|-----------------------|---------------------|--------|-----------------------|
| XP_008454886.1 | 0.04353076            | 0.36182336          | 47     | 47                    |
| XP_008453669.1 | 0.16161075            | 0.40021008          | 45     | 45                    |
| XP_008464470.1 | 0.02344788            | 0.3621673           | 41     | 41                    |
| XP_008455669.1 | 0.02811092            | 0.3544186           | 39     | 39                    |
| XP_008447164.1 | 0.01428812            | 0.35018382          | 39     | 39                    |
| XP_008467053.1 | 0.01374343            | 0.34986226          | 38     | 38                    |
| XP_008442863.1 | 0.01146916            | 0.34762774          | 37     | 37                    |
| XP_008442648.1 | 0.02225901            | 0.35310473          | 37     | 37                    |
| XP_008462502.1 | 0.0161428             | 0.33957219          | 35     | 35                    |
| XP_008442208.1 | 0.00724988            | 0.34231806          | 35     | 35                    |
| XP_008439295.1 | 0.01451041            | 0.34794521          | 35     | 35                    |
| XP_008449192.1 | 0.04602161            | 0.35875706          | 34     | 34                    |
| XP_008457746.1 | 0.01059097            | 0.33538732          | 33     | 33                    |
| XP_008452849.1 | 0.04547195            | 0.37170732          | 33     | 33                    |
| XP_008437251.1 | 0.00299694            | 0.32731959          | 32     | 32                    |
| XP_008462876.1 | 0.06736557            | 0.36182336          | 32     | 32                    |
| XP_008461503.1 | 0.00523682            | 0.33896797          | 32     | 32                    |
| XP_008454475.1 | 0.02589995            | 0.33568282          | 31     | 31                    |
| XP_008438467.1 | 0.04144616            | 0.35212569          | 31     | 31                    |
| XP_008440805.1 | 0.01247235            | 0.34448463          | 31     | 31                    |
| XP_008454581.1 | 0.01247235            | 0.34448463          | 31     | 31                    |
| XP_008447536.1 | 0.03704247            | 0.3557423           | 30     | 30                    |
| XP_008465377.1 | 0.00259549            | 0.33130435          | 29     | 29                    |
| XP_008460907.1 | 0.00967448            | 0.33716814          | 28     | 28                    |
| XP_008462762.1 | 0.05363781            | 0.34699454          | 28     | 28                    |
| XP_008465290.1 | 0.03363968            | 0.34201077          | 28     | 28                    |
| XP_008461514.1 | 0.0182462             | 0.34448463          | 27     | 27                    |
| XP_008459771.1 | 9.35E+00              | 0.32536294          | 26     | 26                    |
| XP_008463920.1 | 0.03203773            | 0.35376045          | 26     | 26                    |
| XP_008437462.1 | 0.0070598             | 0.33333333          | 25     | 25                    |
| XP_008438779.1 | 0.07888137            | 0.35909519          | 25     | 25                    |
| XP_008438682.1 | 0.02575229            | 0.33509235          | 25     | 25                    |
| XP_008454446.1 | 0.02308093            | 0.33866667          | 24     | 24                    |
| XP_008443016.1 | 0.01402858            | 0.32425532          | 23     | 23                    |
| XP_008438518.1 | 0.01137911            | 0.35180055          | 23     | 23                    |
| XP_008460737.1 | 0.00409518            | 0.31856187          | 23     | 23                    |
| XP_008450536.1 | 0.02424612            | 0.33391762          | 23     | 23                    |
| XP_008450874.1 | 0.0066178             | 0.32480818          | 22     | 22                    |
| XP_008448880.1 | 0.0010395             | 0.32233503          | 22     | 22                    |
| XP_008441349.1 | 0.00172675            | 0.31829574          | 22     | 22                    |
| XP_008448616.1 | 7.71E+00              | 0.30407023          | 22     | 22                    |
| XP_008439282.1 | 0.03921441            | 0.34604905          | 22     | 22                    |
| XP_008459467.1 | 0.03956305            | 0.36079545          | 22     | 22                    |
| XP_008462146.1 | 0.01932258            | 0.31856187          | 22     | 22                    |
| XP_008456763.1 | 0.04276626            | 0.34324324          | 22     | 22                    |
| XP_008458892.1 | 0.02864363            | 0.33391762          | 22     | 22                    |
| XP_008466625.1 | 0.02885188            | 0.31618257          | 21     | 21                    |

---

|                |            |            |    |    |
|----------------|------------|------------|----|----|
| XP_008439389.1 | 0.01258917 | 0.33627538 | 21 | 21 |
| XP_008444821.1 | 0.06753463 | 0.34355275 | 21 | 21 |
| XP_008461070.1 | 0.03733943 | 0.33987511 | 21 | 21 |
| XP_008449135.1 | 0.03923533 | 0.33509235 | 21 | 21 |
| XP_008458420.1 | 0.00814082 | 0.31203931 | 20 | 20 |
| XP_008462238.1 | 0.00455571 | 0.31178396 | 20 | 20 |
| XP_008453490.1 | 0.00714464 | 0.32987013 | 20 | 20 |
| XP_008464716.1 | 0.01879395 | 0.32260796 | 20 | 20 |
| XP_008448895.1 | 0.02209349 | 0.33746678 | 20 | 20 |
| XP_008451008.1 | 0.01734303 | 0.34636364 | 19 | 19 |
| XP_008460000.1 | 0.02097785 | 0.32124789 | 19 | 19 |
| XP_008452461.1 | 0.00163808 | 0.31487603 | 18 | 18 |
| XP_008456305.1 | 0.01342763 | 0.29788898 | 18 | 18 |
| XP_008446677.1 | 0.02544184 | 0.33072917 | 18 | 18 |
| XP_008442118.1 | 0.0068696  | 0.31051345 | 17 | 17 |
| XP_008442967.1 | 0.00346616 | 0.32206255 | 17 | 17 |
| XP_008445419.1 | 2.79E+00   | 0.31102041 | 15 | 15 |
| XP_008461811.1 | 0.02415955 | 0.33421053 | 15 | 15 |
| XP_008446732.1 | 0.03101555 | 0.33657244 | 15 | 15 |
| XP_008438468.1 | 0.03110876 | 0.31229508 | 15 | 15 |
| XP_008441520.1 | 0.00528569 | 0.31306491 | 14 | 14 |
| XP_008443031.1 | 0.00894934 | 0.29835552 | 14 | 14 |
| XP_008464410.1 | 2.16E-02   | 0.30023641 | 14 | 14 |
| XP_008437664.1 | 0.01047539 | 0.29150727 | 14 | 14 |
| XP_008443510.1 | 0.02773965 | 0.32260796 | 14 | 14 |
| XP_008451507.1 | 0.00546093 | 0.31539735 | 14 | 14 |
| XP_008437786.1 | 0.01566662 | 0.29017517 | 14 | 14 |
| XP_008448699.1 | 0.00746309 | 0.29443586 | 13 | 13 |
| XP_008455119.1 | 3.21E+00   | 0.3062701  | 12 | 12 |
| XP_008438525.1 | 3.21E+00   | 0.3062701  | 12 | 12 |
| XP_008447031.1 | 0.02313673 | 0.31332237 | 12 | 12 |
| XP_008443308.1 | 0.00568491 | 0.2912844  | 12 | 12 |
| XP_008463566.1 | 0.03556638 | 0.33627538 | 12 | 12 |
| XP_008453860.1 | 0.00736016 | 0.32070707 | 11 | 11 |
| XP_008453019.1 | 0.01631971 | 0.30023641 | 11 | 11 |
| XP_008446322.1 | 0.01655297 | 0.29976397 | 11 | 11 |
| XP_008452997.1 | 0.01433803 | 0.30142405 | 11 | 11 |
| XP_008451505.1 | 0.0043249  | 0.28776435 | 10 | 10 |
| XP_008453367.1 | 0.00785714 | 0.31051345 | 10 | 10 |
| XP_008458957.1 | 1.49E-02   | 0.29106188 | 10 | 10 |
| XP_008453848.1 | 0.01040009 | 0.28689759 | 10 | 10 |
| XP_008453082.1 | 0.03187766 | 0.31882845 | 10 | 10 |
| XP_008462814.1 | 0.00556374 | 0.28776435 | 10 | 10 |
| XP_008449299.1 | 0.03327329 | 0.2881997  | 10 | 10 |
| XP_008441268.1 | 0.00104533 | 0.30358566 | 10 | 10 |
| XP_008454536.1 | 7.79E+00   | 0.30900243 | 9  | 9  |
| XP_008457549.1 | 0.00479225 | 0.29512006 | 9  | 9  |
| XP_008447327.1 | 0.01549364 | 0.32288136 | 9  | 9  |
| XP_008464542.1 | 0.01343467 | 0.31618257 | 9  | 9  |

---

|                |            |            |   |   |
|----------------|------------|------------|---|---|
| XP_008459496.1 | 0.00783295 | 0.30238095 | 9 | 9 |
| XP_008443896.1 | 3.07E-02   | 0.28411633 | 9 | 9 |
| XP_008459445.1 | 0.01363207 | 0.28055965 | 9 | 9 |
| XP_008448821.1 | 0.0143627  | 0.27469358 | 9 | 9 |
| XP_008448941.1 | 0.02433552 | 0.27973568 | 9 | 9 |
| XP_008450327.1 | 0.00940392 | 0.29240215 | 9 | 9 |
| XP_008437346.1 | 0.01102551 | 0.2881997  | 9 | 9 |
| XP_008438929.1 | 0.04525324 | 0.31803005 | 9 | 9 |
| XP_008463072.1 | 0.00330337 | 0.30358566 | 8 | 8 |
| XP_008451978.1 | 0.02318902 | 0.30651649 | 8 | 8 |
| Aco            | 0.01195922 | 0.28159645 | 8 | 8 |
| XP_008437877.1 | 0.00678478 | 0.32179054 | 8 | 8 |
| XP_008440388.1 | 0.00677319 | 0.30701048 | 8 | 8 |
| XP_008437161.1 | 7.25E+00   | 0.29083969 | 8 | 8 |
| XP_008464473.1 | 0.02110297 | 0.3        | 8 | 8 |
| XP_008446109.1 | 0.00776202 | 0.25883152 | 8 | 8 |
| XP_008447122.1 | 0.00454145 | 0.30023641 | 8 | 8 |
| XP_008459673.1 | 0.00470834 | 0.31127451 | 8 | 8 |
| XP_008443470.1 | 0.02335797 | 0.28432836 | 8 | 8 |
| XP_008439417.1 | 0.01092416 | 0.29835552 | 8 | 8 |
| XP_008452866.1 | 0.02979693 | 0.27528902 | 7 | 7 |
| XP_008462280.1 | 7.71E+00   | 0.28863636 | 7 | 7 |
| XP_008450259.1 | 7.18E+00   | 0.29765625 | 7 | 7 |
| XP_008462466.1 | 0.00473241 | 0.31026059 | 7 | 7 |
| XP_008443923.1 | 0.006095   | 0.28180473 | 7 | 7 |
| XP_008457356.1 | 0.00200678 | 0.31989924 | 7 | 7 |
| XP_008438697.1 | 0.00162804 | 0.30286169 | 7 | 7 |
| XP_008451640.1 | 0.01529558 | 0.28841787 | 7 | 7 |
| XP_008439052.1 | 0.0028146  | 0.29262673 | 7 | 7 |
| XP_008447079.1 | 0.01192176 | 0.28222222 | 7 | 7 |
| XP_008448067.1 | 0.00691142 | 0.31409728 | 7 | 7 |
| XP_008440934.1 | 0.0108573  | 0.2962675  | 7 | 7 |
| XP_008450272.1 | 0.01248094 | 0.26006826 | 7 | 7 |
| XP_008457125.1 | 1.02E+00   | 0.28411633 | 7 | 7 |
| XP_008460496.1 | 0.00830413 | 0.27789934 | 6 | 6 |
| XP_008463154.1 | 0          | 0.28180473 | 6 | 6 |
| XP_008447246.1 | 0.02139606 | 0.2733142  | 6 | 6 |
| XP_008449129.1 | 0.00138572 | 0.27749454 | 6 | 6 |
| XP_008442226.1 | 0.00770515 | 0.30238095 | 6 | 6 |
| XP_008448578.1 | 0.01479436 | 0.26887791 | 6 | 6 |
| XP_008457937.1 | 0.02623067 | 0.2555332  | 6 | 6 |
| XP_008466111.1 | 0.00575218 | 0.26239669 | 6 | 6 |
| XP_008446601.1 | 3.60E-07   | 0.26718093 | 6 | 6 |
| XP_008439004.1 | 0.01079686 | 0.25900748 | 6 | 6 |
| TOP6A          | 8.40E+00   | 0.28885519 | 6 | 6 |
| XP_008454826.1 | 0.02104956 | 0.26830986 | 6 | 6 |
| XP_008458711.1 | 0.00856982 | 0.27608696 | 6 | 6 |
| XP_008463634.1 | 0.0059927  | 0.28929385 | 6 | 6 |
| XP_008462594.1 | 0.01632311 | 0.27292264 | 6 | 6 |



|                |            |            |   |   |
|----------------|------------|------------|---|---|
| XP_008451559.1 | 0.00991985 | 0.30214116 | 6 | 6 |
| XP_008453280.1 | 4.26E+00   | 0.29083969 | 6 | 6 |
| XP_008467106.1 | 0.00184639 | 0.26868829 | 5 | 5 |
| XP_008459664.1 | 0.00212491 | 0.28222222 | 5 | 5 |
| XP_008461846.1 | 3.14E+00   | 0.28689759 | 5 | 5 |
| XP_008439427.1 | 0.00567027 | 0.27688953 | 5 | 5 |
| XP_008454527.1 | 0.00459114 | 0.27608696 | 5 | 5 |
| XP_008444858.1 | 0.01273482 | 0.25016415 | 5 | 5 |
| XP_008461699.1 | 0.01246367 | 0.25918367 | 5 | 5 |
| XP_008439650.1 | 0.00700149 | 0.28222222 | 5 | 5 |
| XP_008450845.1 | 0.0021339  | 0.28097345 | 5 | 5 |
| XP_008452546.1 | 0.00231924 | 0.22993361 | 5 | 5 |
| XP_008444744.1 | 0.00178932 | 0.27729258 | 5 | 5 |
| XP_008455774.1 | 0.00375391 | 0.28014706 | 5 | 5 |
| XP_008464603.1 | 0.00668358 | 0.24869452 | 5 | 5 |
| XP_008465872.1 | 0.00677386 | 0.25760649 | 5 | 5 |
| XP_008452710.1 | 0.00675184 | 0.254      | 4 | 4 |
| XP_008453742.1 | 0          | 0.28432836 | 4 | 4 |
| XP_008452411.1 | 0.0116763  | 0.24007561 | 4 | 4 |
| XP_008453553.1 | 6.23E+00   | 0.26662001 | 4 | 4 |
| XP_008462810.1 | 0.01063157 | 0.30750605 | 4 | 4 |
| XP_008439694.1 | 2.77E+00   | 0.29195402 | 4 | 4 |
| XP_008464456.1 | 2.77E+00   | 0.29195402 | 4 | 4 |
| XP_008456047.1 | 8.34E+00   | 0.26167582 | 4 | 4 |
| XP_008466844.1 | 0.0068165  | 0.24098672 | 4 | 4 |
| XP_008439190.1 | 0.01602206 | 0.26275862 | 4 | 4 |
| XP_008448477.1 | 0.00179125 | 0.2845407  | 4 | 4 |
| XP_008444367.1 | 0.00526316 | 0.18676471 | 4 | 4 |
| XP_008452214.1 | 0.00101995 | 0.27608696 | 4 | 4 |
| XP_008451091.1 | 0          | 0.2602459  | 4 | 4 |
| XP_008447262.1 | 0.00606321 | 0.26239669 | 4 | 4 |
| XP_008440544.1 | 0.00528996 | 0.25760649 | 4 | 4 |
| XP_008463950.1 | 0.00352835 | 0.28180473 | 4 | 4 |
| XP_008455158.1 | 0.01224253 | 0.24267516 | 4 | 4 |
| XP_008437194.1 | 0.00184695 | 0.21525424 | 4 | 4 |
| XP_008459075.1 | 7.75E+00   | 0.27098151 | 4 | 4 |
| XP_008447733.1 | 0.01566515 | 0.19598765 | 4 | 4 |
| XP_008442794.1 | 0.00337536 | 0.28646617 | 4 | 4 |
| XP_008458624.1 | 0.00337536 | 0.28646617 | 4 | 4 |
| XP_008463402.1 | 0.00820941 | 0.26662001 | 4 | 4 |
| XP_008460883.1 | 0.00820941 | 0.26662001 | 4 | 4 |
| XP_008443744.1 | 0.00667191 | 0.27002126 | 4 | 4 |
| XP_008463276.1 | 5.81E-02   | 0.2602459  | 4 | 4 |
| XP_008437957.1 | 5.81E-02   | 0.2602459  | 4 | 4 |
| XP_008464495.1 | 6.30E-05   | 0.26868829 | 4 | 4 |
| XP_008463855.1 | 3.30E+00   | 0.25656566 | 3 | 3 |
| XP_008461685.1 | 0.00132993 | 0.27830533 | 3 | 3 |
| ETR1           | 8.05E+00   | 0.22965642 | 3 | 3 |
| XP_008458353.1 | 0.00524934 | 0.22597865 | 3 | 3 |

|                |            |            |   |   |
|----------------|------------|------------|---|---|
| XP_008444441.1 | 0.01047106 | 0.24252069 | 3 | 3 |
| XP_008458157.1 | 0.00524934 | 0.25165125 | 3 | 3 |
| XP_008451876.1 | 0.01099037 | 0.22855429 | 3 | 3 |
| XP_008440490.1 | 0          | 0.28306092 | 3 | 3 |
| XP_008441404.1 | 4.05E-01   | 0.25673854 | 3 | 3 |
| XP_008447551.1 | 0.00350831 | 0.22869148 | 3 | 3 |
| XP_008445000.1 | 0.00350831 | 0.22869148 | 3 | 3 |
| XP_008450776.1 | 0.00350831 | 0.22869148 | 3 | 3 |
| XP_008452185.1 | 0.00524934 | 0.21202003 | 3 | 3 |
| XP_008446329.1 | 0.00607842 | 0.2106136  | 3 | 3 |
| XP_008452845.1 | 0.00524934 | 0.21947005 | 3 | 3 |
| XP_008445019.1 | 0.00126514 | 0.23388582 | 3 | 3 |
| XP_008457374.1 | 4.06E+00   | 0.29976397 | 3 | 3 |
| XP_008437395.1 | 3.89E+00   | 0.23062954 | 3 | 3 |
| XP_008446589.1 | 0          | 0.26736842 | 3 | 3 |
| XP_008461390.1 | 0.00776706 | 0.26699369 | 3 | 3 |
| XP_008439227.1 | 1.73E-06   | 0.27117438 | 3 | 3 |
| XP_008450968.1 | 0          | 0.16408269 | 3 | 3 |
| XP_008448661.1 | 0          | 0.16408269 | 3 | 3 |
| XP_008455290.1 | 0          | 0.16408269 | 3 | 3 |
| XP_008458848.1 | 1          | 1          | 3 | 3 |
| XP_008446870.1 | 0          | 0.26718093 | 3 | 3 |
| XP_008437236.1 | 4.36E-01   | 0.25587643 | 3 | 3 |
| XP_008444500.1 | 3.22E+00   | 0.2803532  | 3 | 3 |
| XP_008438679.1 | 1.73E+00   | 0.24967235 | 3 | 3 |
| XP_008460434.1 | 0          | 0.26060192 | 3 | 3 |
| XP_008460254.1 | 0.00454508 | 0.29017517 | 3 | 3 |
| XP_008453230.1 | 0.00525625 | 0.15191388 | 3 | 3 |
| XP_008457834.1 | 0.00554009 | 0.26348548 | 3 | 3 |
| XP_008458707.1 | 0.02083851 | 0.21697039 | 3 | 3 |
| XP_008466671.1 | 0.00536491 | 0.21858864 | 3 | 3 |
| XP_008466825.1 | 1.39E+00   | 0.26569038 | 3 | 3 |
| XP_008442880.1 | 0.01048487 | 0.22438163 | 3 | 3 |
| XP_008460691.1 | 0          | 0.27002126 | 3 | 3 |
| XP_008465238.1 | 0.00524934 | 0.26078029 | 3 | 3 |
| XP_008441967.1 | 0.0010356  | 0.26275862 | 3 | 3 |
| XP_008449342.1 | 0.01077204 | 0.27021277 | 3 | 3 |
| XP_008460982.1 | 3.45E-06   | 0.21154914 | 3 | 3 |
| XP_008456983.1 | 4.19E+00   | 0.26275862 | 3 | 3 |
| XP_008443519.1 | 0.0010255  | 0.25989086 | 3 | 3 |
| XP_008448221.1 | 0.00261776 | 0.20396146 | 3 | 3 |
| XP_008450732.1 | 0.00261776 | 0.20396146 | 3 | 3 |
| XP_008463648.1 | 0.00560795 | 0.26868829 | 3 | 3 |
| XP_008442391.1 | 0.0055198  | 0.24660194 | 3 | 3 |
| XP_008456354.1 | 0.00524934 | 0.22544379 | 3 | 3 |
| XP_008451830.1 | 0          | 0.27059659 | 3 | 3 |
| XP_008442904.1 | 0          | 0.27059659 | 3 | 3 |
| XP_008457973.1 | 0          | 0.26330339 | 3 | 3 |

|                |            |            |   |   |
|----------------|------------|------------|---|---|
| XP_008462276.1 | 0          | 0.26330339 | 3 | 3 |
| XP_008438110.1 | 0          | 0.2881997  | 3 | 3 |
| XP_008449030.1 | 7.95E+00   | 0.2651357  | 3 | 3 |
| XP_008437645.1 | 0          | 0.23489519 | 2 | 2 |
| XP_008458028.1 | 0          | 0.19538462 | 2 | 2 |
| XP_008438372.1 | 3.96E-02   | 0.22746269 | 2 | 2 |
| XP_008453974.1 | 0.00524934 | 0.18630807 | 2 | 2 |
| XP_008459573.1 | 0          | 0.28929385 | 2 | 2 |
| XP_008443861.1 | 0          | 0.19538462 | 2 | 2 |
| XP_008442471.1 | 0.00524934 | 0.26569038 | 2 | 2 |
| XP_008460136.1 | 0          | 0.26587579 | 2 | 2 |
| XP_008465427.1 | 2.46E-01   | 0.21947005 | 2 | 2 |
| XP_008460595.1 | 0.00524934 | 0.24175127 | 2 | 2 |
| XP_008455007.1 | 3.60E-07   | 0.25989086 | 2 | 2 |
| XP_008461178.1 | 0          | 1          | 2 | 2 |
| XP_008450772.1 | 0          | 1          | 2 | 2 |
| XP_008450188.1 | 0          | 0.23489519 | 2 | 2 |
| XP_008446095.1 | 0          | 1          | 2 | 2 |
| XP_008453801.1 | 0.00524934 | 0.24068225 | 2 | 2 |
| XP_008447788.1 | 7.88E-02   | 0.24950884 | 2 | 2 |
| XP_008443230.1 | 0.00122793 | 0.27509025 | 2 | 2 |
| XP_008463923.1 | 9.15E+00   | 0.24236641 | 2 | 2 |
| XP_008465888.1 | 0.00524934 | 0.21308725 | 2 | 2 |
| XP_008463003.1 | 0          | 0.2555332  | 2 | 2 |
| XP_008457420.1 | 0          | 0.22112594 | 2 | 2 |
| XP_008457419.1 | 0          | 0.22112594 | 2 | 2 |
| XP_008445594.1 | 0          | 0.2555332  | 2 | 2 |
| XP_008454478.1 | 0          | 0.27021277 | 2 | 2 |
| XP_008440953.1 | 0          | 0.24596514 | 2 | 2 |
| XP_008451250.1 | 3.19E+00   | 0.19558522 | 2 | 2 |
| XP_008450018.1 | 0.00390607 | 0.22557726 | 2 | 2 |
| XP_008461196.1 | 0.00165231 | 0.26587579 | 2 | 2 |
| XP_008465979.1 | 0.00522172 | 0.17870544 | 2 | 2 |
| XP_008451256.1 | 3.45E-06   | 0.21084671 | 2 | 2 |
| XP_008462834.1 | 0.16666667 | 0.75       | 2 | 2 |
| XP_008460086.1 | 0.16666667 | 0.75       | 2 | 2 |
| XP_008466095.1 | 0.16666667 | 0.75       | 2 | 2 |
| XP_008462872.1 | 0          | 0.23302752 | 2 | 2 |
| XP_008451613.1 | 0.02083161 | 0.24267516 | 2 | 2 |
| XP_008451399.1 | 0.00524934 | 0.23562152 | 2 | 2 |
| XP_008440131.1 | 1          | 1          | 2 | 2 |
| XP_008453604.1 | 0          | 0.23827392 | 2 | 2 |
| XP_008437762.1 | 3.45E-06   | 0.22306792 | 2 | 2 |
| XP_008464648.1 | 0          | 0.27253219 | 2 | 2 |
| XP_008444779.1 | 0          | 0.27253219 | 2 | 2 |
| XP_008444004.1 | 0          | 0.21190211 | 2 | 2 |
| XP_008448397.1 | 0          | 0.24918247 | 2 | 2 |
| XP_008446428.1 | 5.11E+00   | 0.23331292 | 2 | 2 |

|                |            |            |   |   |
|----------------|------------|------------|---|---|
| XP_008466011.1 | 2.38E+00   | 0.23021148 | 2 | 2 |
| XP_008454116.1 | 5.74E+00   | 0.23842303 | 2 | 2 |
| XP_008456911.1 | 0          | 0.26587579 | 2 | 2 |
| XP_008449373.1 | 7.08E-05   | 0.23887147 | 2 | 2 |
| XP_008459469.1 | 3.75E-02   | 0.25181758 | 2 | 2 |
| XP_008458479.1 | 0.00125962 | 0.23007246 | 2 | 2 |
| XP_008441966.1 | 0.00163846 | 0.2092257  | 2 | 2 |
| XP_008467293.1 | 0.00524934 | 0.20616883 | 2 | 2 |
| XP_008461471.1 | 1.89E+00   | 0.26532033 | 2 | 2 |
| XP_008452480.1 | 9.90E+00   | 0.22023121 | 2 | 2 |
| XP_008439107.1 | 0.16666667 | 0.75       | 2 | 2 |
| CmGal2         | 0.00522172 | 0.17870544 | 2 | 2 |
| XP_008452797.1 | 7.54E-02   | 0.26983003 | 2 | 2 |
| XP_008451338.1 | 0          | 0.16955941 | 2 | 2 |
| XP_008446024.1 | 3.99E-02   | 0.24205845 | 2 | 2 |
| XP_008441406.1 | 3.99E-02   | 0.24205845 | 2 | 2 |
| XP_008447343.1 | 0.00524934 | 0.23104912 | 2 | 2 |
| XP_008450952.1 | 0.01047106 | 0.25795531 | 2 | 2 |
| XP_008444317.1 | 0.00524934 | 0.20539084 | 2 | 2 |
| XP_008449515.1 | 0          | 0.22531047 | 2 | 2 |
| XP_008447722.1 | 0          | 0.24407431 | 1 | 1 |
| XP_008441772.1 | 0          | 0.2557047  | 1 | 1 |
| XP_008462041.1 | 0          | 0.18441433 | 1 | 1 |
| XP_008449410.1 | 0          | 0.20363442 | 1 | 1 |
| XP_008465818.1 | 0          | 0.20363442 | 1 | 1 |
| XP_008451911.1 | 0          | 0.23090909 | 1 | 1 |
| XP_008452552.1 | 0          | 0.19369598 | 1 | 1 |
| XP_008451563.1 | 0          | 0.17501148 | 1 | 1 |
| XP_008443301.1 | 0          | 0.19428863 | 1 | 1 |
| XP_008451866.1 | 0          | 0.21202003 | 1 | 1 |
| XP_008461300.1 | 0          | 0.1571134  | 1 | 1 |
| XP_008446722.1 | 0          | 0.26532033 | 1 | 1 |
| XP_008455791.1 | 0          | 0.21003308 | 1 | 1 |
| XP_008464882.1 | 0          | 0.20583468 | 1 | 1 |
| XP_008461049.1 | 0          | 0.19478528 | 1 | 1 |
| XP_008454511.1 | 0          | 0.21084671 | 1 | 1 |
| XP_008441399.1 | 0          | 0.26587579 | 1 | 1 |
| XP_008456444.1 | 0          | 0.15743802 | 1 | 1 |
| MPG            | 0          | 0.6        | 1 | 1 |
| XP_008450474.1 | 0          | 0.6        | 1 | 1 |
| XP_008437742.1 | 0          | 0.20796943 | 1 | 1 |
| XP_008439328.1 | 0          | 0.20021019 | 1 | 1 |
| XP_008446408.1 | 0          | 0.20021019 | 1 | 1 |
| XP_008450817.1 | 0          | 0.2049489  | 1 | 1 |
| XP_008455225.1 | 0          | 0.17573801 | 1 | 1 |
| XP_008449181.1 | 0          | 0.19538462 | 1 | 1 |
| XP_008440759.1 | 0          | 0.13192521 | 1 | 1 |
| XP_008458544.1 | 0          | 0.20650407 | 1 | 1 |
| XP_008459483.1 | 0          | 0.21476888 | 1 | 1 |

---

|                |   |            |   |   |
|----------------|---|------------|---|---|
| XP_008449810.1 | 0 | 0.19538462 | 1 | 1 |
| XP_008460884.1 | 0 | 0.20572354 | 1 | 1 |
| XP_008449753.1 | 0 | 0.25778078 | 1 | 1 |
| XP_008437485.1 | 0 | 0.18005671 | 1 | 1 |
| XP_008454884.1 | 0 | 0.17946302 | 1 | 1 |
| XP_008454150.1 | 0 | 0.18334937 | 1 | 1 |
| XP_008454372.1 | 0 | 0.6        | 1 | 1 |
| XP_008457683.1 | 0 | 1          | 1 | 1 |
| XP_008440147.1 | 0 | 1          | 1 | 1 |
| XP_008449448.1 | 0 | 0.21166667 | 1 | 1 |
| XP_008445331.1 | 0 | 0.2257109  | 1 | 1 |
| XP_008442978.1 | 0 | 0.25181758 | 1 | 1 |
| XP_008451870.1 | 0 | 0.66666667 | 1 | 1 |
| XP_008458577.1 | 0 | 0.22151163 | 1 | 1 |
| XP_008461564.1 | 0 | 0.24175127 | 1 | 1 |
| XP_008443790.1 | 0 | 0.23104912 | 1 | 1 |
| XP_008444036.1 | 0 | 1          | 1 | 1 |
| XP_008443958.1 | 0 | 1          | 1 | 1 |
| XP_008459305.1 | 0 | 1          | 1 | 1 |
| XP_008441500.1 | 0 | 1          | 1 | 1 |
| XP_008455112.1 | 0 | 1          | 1 | 1 |
| XP_008451100.1 | 0 | 1          | 1 | 1 |
| XP_008457332.1 | 0 | 0.28603604 | 1 | 1 |
| XP_008446222.1 | 0 | 0.28603604 | 1 | 1 |
| XP_008437362.1 | 0 | 0.20116156 | 1 | 1 |
| XP_008463944.1 | 0 | 0.21452703 | 1 | 1 |
| XP_008454463.1 | 0 | 0.19369598 | 1 | 1 |
| XP_008447666.1 | 0 | 0.20650407 | 1 | 1 |
| XP_008465791.1 | 0 | 0.25115359 | 1 | 1 |
| XP_008457246.1 | 0 | 0.21273032 | 1 | 1 |
| XP_008439275.1 | 0 | 0.19792208 | 1 | 1 |
| XP_008446147.1 | 0 | 0.20695274 | 1 | 1 |
| XP_008451966.1 | 0 | 0.18405797 | 1 | 1 |
| XP_008457243.1 | 0 | 0.26587579 | 1 | 1 |
| XP_008445275.1 | 0 | 0.256393   | 1 | 1 |
| XP_008465863.1 | 0 | 0.256393   | 1 | 1 |
| XP_008438129.1 | 0 | 0.22398589 | 1 | 1 |
| XP_008448946.1 | 0 | 0.24423077 | 1 | 1 |
| XP_008448153.1 | 0 | 0.17100539 | 1 | 1 |
| XP_008448687.1 | 0 | 0.21871412 | 1 | 1 |
| XP_008457427.1 | 0 | 0.21871412 | 1 | 1 |
| XP_008444640.1 | 0 | 0.19926778 | 1 | 1 |
| XP_008465836.1 | 0 | 0.26439972 | 1 | 1 |
| XP_008453249.1 | 0 | 0.26439972 | 1 | 1 |
| XP_008465871.1 | 0 | 0.21871412 | 1 | 1 |
| XP_008438880.1 | 0 | 0.21871412 | 1 | 1 |
| XP_008438494.1 | 0 | 0.18777723 | 1 | 1 |
| XP_008439393.1 | 0 | 0.22151163 | 1 | 1 |
| XP_008458303.1 | 0 | 0.24407431 | 1 | 1 |

---

|                |   |            |   |   |
|----------------|---|------------|---|---|
| XP_008451001.1 | 0 | 0.24407431 | 1 | 1 |
| XP_008452401.1 | 0 | 0.25065789 | 1 | 1 |
| XP_008440609.1 | 0 | 0.20865279 | 1 | 1 |
| XP_008451128.1 | 0 | 0.19078618 | 1 | 1 |
| XP_008462510.1 | 0 | 0.24190476 | 1 | 1 |
| XP_008457064.1 | 0 | 0.22451385 | 1 | 1 |
| XP_008458405.1 | 0 | 0.22023121 | 1 | 1 |
| XP_008461043.1 | 0 | 0.19409068 | 1 | 1 |
| XP_008465972.1 | 0 | 0.1704698  | 1 | 1 |
| XP_008442759.1 | 0 | 0.21190211 | 1 | 1 |
| XP_008443430.1 | 0 | 0.66666667 | 1 | 1 |
| XP_008448128.1 | 0 | 0.21452703 | 1 | 1 |
| XP_008451157.1 | 0 | 0.25198413 | 1 | 1 |
| XP_008455395.1 | 0 | 0.17405208 | 1 | 1 |
| XP_008445126.1 | 0 | 0.23708774 | 1 | 1 |
| XP_008440744.1 | 0 | 0.18334937 | 1 | 1 |
