# Supplementary material for: Transcriptome profiling of non-climacteric ‘yellow’ melon during ripening: insights on sugar metabolism
Source: PubMed Central journal article supplement (PMC7106763; doi:10.1186/s12864-020-6667-0), 2020-03-30
Supplement: 12864_2020_6667_MOESM9_ESM.pdf [file 12864_2020_6667_MOESM9_ESM.pdf]

**Table S9** Subnetwork profile of young fruit (10 DAP) generated by STRING and Cytoscape analyses.

| <b>ID name</b> | <b>BetweennessCentrality</b> | <b>ClosenessCentrality</b> | <b>Degree</b> | <b>NumberOfDirectedEdges</b> |
|----------------|------------------------------|----------------------------|---------------|------------------------------|
| XP_008443206.1 | 0.48676176                   | 0.45121951                 | 10            | 10                           |
| XP_008463167.1 | 0.16653082                   | 0.38947368                 | 9             | 9                            |
| NP_001284469.1 | 0.18057343                   | 0.37373737                 | 9             | 9                            |
| XP_008444380.1 | 0.1022308                    | 0.41573034                 | 8             | 8                            |
| XP_008445911.1 | 0.16947304                   | 0.42045455                 | 8             | 8                            |
| XP_008452100.1 | 0.19270699                   | 0.40217391                 | 6             | 6                            |
| XP_008457154.1 | 0.09373659                   | 0.37373737                 | 6             | 6                            |
| XP_008440310.1 | 0.12805305                   | 0.39361702                 | 5             | 5                            |
| XP_008451468.1 | 0.00209138                   | 0.33333333                 | 5             | 5                            |
| XP_008452914.1 | 0.07100672                   | 0.37                       | 5             | 5                            |
| XP_008446229.1 | 0.05405405                   | 0.30327869                 | 4             | 4                            |
| XP_008438007.1 | 0.25075075                   | 0.28244275                 | 4             | 4                            |
| XP_008467118.1 | 0.05934506                   | 0.31623932                 | 4             | 4                            |
| XP_008443553.1 | 0.001716                     | 0.33035714                 | 4             | 4                            |
| XP_008460758.1 | 0.001716                     | 0.33035714                 | 4             | 4                            |
| XP_008460145.1 | 0                            | 0.30081301                 | 3             | 3                            |
| XP_008459427.1 | 0.10660661                   | 0.22699387                 | 3             | 3                            |
| XP_008458374.1 | 0.00525526                   | 0.33636364                 | 3             | 3                            |
| XP_008438969.1 | 0.00775776                   | 0.30327869                 | 3             | 3                            |
| XP_008446196.1 | 0.27927928                   | 0.35238095                 | 3             | 3                            |
| XP_008465523.1 | 2.15E-01                     | 0.3592233                  | 3             | 3                            |
| XP_008453253.1 | 0.05405405                   | 0.30081301                 | 3             | 3                            |
| XP_008441351.1 | 0.03878879                   | 0.35576923                 | 3             | 3                            |
| XP_008442968.1 | 0                            | 0.31355932                 | 3             | 3                            |
| XP_008459280.1 | 7.51E+00                     | 0.22155689                 | 2             | 2                            |
| XP_008450452.1 | 0.02627628                   | 0.27819549                 | 2             | 2                            |
| XP_008462107.1 | 0                            | 0.31623932                 | 2             | 2                            |
| XP_008453064.1 | 0.02627628                   | 0.27819549                 | 2             | 2                            |
| XP_008437557.1 | 0                            | 0.18592965                 | 1             | 1                            |
| XP_008465204.1 | 0                            | 0.18592965                 | 1             | 1                            |
| XP_008451740.1 | 0                            | 0.2327044                  | 1             | 1                            |
| XP_008466126.1 | 0                            | 0.24183007                 | 1             | 1                            |
| XP_008439346.1 | 0                            | 0.23417722                 | 1             | 1                            |
| XP_008454693.1 | 0                            | 0.28461538                 | 1             | 1                            |
| XP_008449737.1 | 0                            | 0.31355932                 | 1             | 1                            |
| XP_008460901.1 | 0                            | 0.22155689                 | 1             | 1                            |
| XP_008460902.1 | 0                            | 0.22155689                 | 1             | 1                            |
| XP_008437427.1 | 0                            | 0.28461538                 | 1             | 1                            |

**Table S10** STRING interactions of subnetwork young fruit (10 DAP).

| #node1             | node2              | node1_string_internal_id | node2_string_internal_id | node1_external_id       | node2_external_id       | neighborhood_chromosome | gene_fusion | phylogenetic_cooccurrence | homology | coexpression | experimentally_determined_interaction | database_annotated | automated_textmining | combined_score |
|--------------------|--------------------|--------------------------|--------------------------|-------------------------|-------------------------|-------------------------|-------------|---------------------------|----------|--------------|---------------------------------------|--------------------|----------------------|----------------|
| XP_008457<br>154.1 | XP_008442<br>968.1 | 530584                   | 521376                   | 3656.XP_0<br>08457154.1 | 3656.XP_0<br>08442968.1 | 0.075                   | 0           | 0.306                     | 0        | 0            | 0.154                                 | 0.9                | 0.455                | 0.965          |
| XP_008463<br>167.1 | XP_008442<br>968.1 | 534543                   | 521376                   | 3656.XP_0<br>08463167.1 | 3656.XP_0<br>08442968.1 | 0.075                   | 0           | 0.422                     | 0        | 0            | 0.154                                 | 0.9                | 0.141                | 0.954          |
| NP_001284<br>469.1 | XP_008463<br>167.1 | 537263                   | 534543                   | 3656.XP_0<br>08467212.1 | 3656.XP_0<br>08463167.1 | 0                       | 0           | 0                         | 0        | 0            | 0                                     | 0.65               | 0.874                | 0.954          |
| XP_008451<br>468.1 | XP_008445<br>911.1 | 526835                   | 523289                   | 3656.XP_0<br>08451468.1 | 3656.XP_0<br>08445911.1 | 0                       | 0           | 0                         | 0        | 0            | 0                                     | 0.9                | 0.495                | 0.947          |
| XP_008453<br>253.1 | XP_008451<br>740.1 | 528014                   | 527018                   | 3656.XP_0<br>08453253.1 | 3656.XP_0<br>08451740.1 | 0.165                   | 0           | 0                         | 0        | 0.111        | 0                                     | 0.9                | 0.355                | 0.945          |
| XP_00844<br>5911.1 | XP_00845<br>1468.1 | 532919                   | 526835                   | 3656.XP_0<br>08460758.1 | 3656.XP_0<br>08451468.1 | 0                       | 0           | 0                         | 0.85     | 0            | 0                                     | 0.9                | 0.565                | 0.908          |
| XP_008451<br>468.1 | XP_008443<br>553.1 | 526835                   | 521754                   | 3656.XP_0<br>08451468.1 | 3656.XP_0<br>08443553.1 | 0                       | 0           | 0                         | 0.931    | 0            | 0                                     | 0.9                | 0.715                | 0.904          |
| NP_001284<br>469.1 | XP_008451<br>468.1 | 537263                   | 526835                   | 3656.XP_0<br>08467212.1 | 3656.XP_0<br>08451468.1 | 0                       | 0           | 0                         | 0        | 0            | 0                                     | 0.9                | 0.042                | 0.9            |
| XP_008445<br>911.1 | XP_008443<br>553.1 | 523289                   | 521754                   | 3656.XP_0<br>08445911.1 | 3656.XP_0<br>08443553.1 | 0                       | 0           | 0                         | 0        | 0            | 0                                     | 0.65               | 0.567                | 0.841          |
| XP_008445<br>911.1 | XP_008445<br>911.1 | 532919                   | 523289                   | 3656.XP_0<br>08460758.1 | 3656.XP_0<br>08445911.1 | 0                       | 0           | 0                         | 0        | 0            | 0                                     | 0.65               | 0.518                | 0.824          |
| XP_008452<br>914.1 | XP_008444<br>380.1 | 527786                   | 522291                   | 3656.XP_0<br>08452914.1 | 3656.XP_0<br>08444380.1 | 0                       | 0           | 0                         | 0        | 0            | 0                                     | 0                  | 0.82                 | 0.82           |
| XP_008446<br>229.1 | XP_008439<br>346.1 | 523509                   | 519034                   | 3656.XP_0<br>08446229.1 | 3656.XP_0<br>08439346.1 | 0                       | 0.007       | 0.443                     | 0.579    | 0            | 0                                     | 0.65               | 0.627                | 0.785          |
| XP_008463<br>167.1 | XP_008457<br>154.1 | 534543                   | 530584                   | 3656.XP_0<br>08463167.1 | 3656.XP_0<br>08457154.1 | 0                       | 0           | 0.356                     | 0.594    | 0            | 0                                     | 0.65               | 0.622                | 0.771          |
| XP_008445<br>911.1 | XP_008443<br>206.1 | 523289                   | 521518                   | 3656.XP_0<br>08445911.1 | 3656.XP_0<br>08443206.1 | 0                       | 0           | 0.299                     | 0        | 0            | 0                                     | 0                  | 0.629                | 0.728          |
| XP_008463<br>167.1 | XP_008440<br>310.1 | 534543                   | 519647                   | 3656.XP_0<br>08463167.1 | 3656.XP_0<br>08440310.1 | 0                       | 0           | 0                         | 0        | 0            | 0                                     | 0                  | 0.707                | 0.707          |
| NP_001284<br>469.1 | XP_008442<br>968.1 | 537263                   | 521376                   | 3656.XP_0<br>08467212.1 | 3656.XP_0<br>08442968.1 | 0.129                   | 0           | 0                         | 0        | 0            | 0                                     | 0.65               | 0.105                | 0.703          |
| NP_001284<br>469.1 | XP_008457<br>154.1 | 537263                   | 530584                   | 3656.XP_0<br>08467212.1 | 3656.XP_0<br>08457154.1 | 0                       | 0           | 0                         | 0        | 0            | 0                                     | 0                  | 0.688                | 0.688          |
| XP_008<br>457154.1 | XP_008             | 530584                   | 523509                   | 3656.XP_0<br>446229.1   | 3656.XP_0               | 0.055                   | 0           | 0<br>08457154.1           | 0        | 0.072        | 0.045<br>08446229.1                   | 0.65               | 0.08                 | 0.681          |
| XP_008463<br>167.1 | XP_008446<br>229.1 | 534543                   | 523509                   | 3656.XP_0<br>08463167.1 | 3656.XP_0<br>08446229.1 | 0.055                   | 0           | 0                         | 0        | 0.072        | 0.045                                 | 0.65               | 0.08                 | 0.681          |

|                    |                    |        |        |                         |                         |       |   |   |   |       |       |      |       |       |
|--------------------|--------------------|--------|--------|-------------------------|-------------------------|-------|---|---|---|-------|-------|------|-------|-------|
| NP_001284<br>469.1 | XP_008445<br>911.1 | 537263 | 523289 | 3656.XP_0<br>08467212.1 | 3656.XP_0<br>08445911.1 | 0     | 0 | 0 | 0 | 0     | 0     | 0.65 | 0.115 | 0.677 |
| NP_001284<br>469.1 | XP_008443<br>553.1 | 537263 | 521754 | 3656.XP_0<br>08467212.1 | 3656.XP_0<br>08443553.1 | 0     | 0 | 0 | 0 | 0     | 0     | 0.65 | 0.11  | 0.675 |
| NP_001284<br>469.1 | XP_008453<br>064.1 | 537263 | 527877 | 3656.XP_0<br>08467212.1 | 3656.XP_0<br>08453064.1 | 0     | 0 | 0 | 0 | 0     | 0     | 0.65 | 0.045 | 0.651 |
| NP_001284<br>469.1 | BG1                | 537263 | 526192 | 3656.XP_0<br>08467212.1 | 3656.XP_0<br>08450452.1 | 0     | 0 | 0 | 0 | 0     | 0     | 0.65 | 0.045 | 0.651 |
| XP_008459<br>280.1 | BG1                | 531977 | 526192 | 3656.XP_0<br>08459280.1 | 3656.XP_0<br>08450452.1 | 0     | 0 | 0 | 0 | 0     | 0     | 0.65 | 0     | 0.65  |
| NP_001284<br>469.1 | XP_008445<br>911.1 | 537263 | 532919 | 3656.XP_0<br>08467212.1 | 3656.XP_0<br>08460758.1 | 0     | 0 | 0 | 0 | 0     | 0     | 0.65 | 0     | 0.65  |
| XP_008459<br>280.1 | XP_008453<br>064.1 | 531977 | 527877 | 3656.XP_0<br>08459280.1 | 3656.XP_0<br>08453064.1 | 0     | 0 | 0 | 0 | 0     | 0     | 0.65 | 0     | 0.65  |
| XP_008452<br>100.1 | XP_008443<br>206.1 | 527257 | 521518 | 3656.XP_0<br>08452100.1 | 3656.XP_0<br>08443206.1 | 0.054 | 0 | 0 | 0 | 0.115 | 0     | 0    | 0.578 | 0.615 |
| XP_008458<br>374.1 | XP_008443<br>206.1 | 531389 | 521518 | 3656.XP_0<br>08458374.1 | 3656.XP_0<br>08443206.1 | 0.084 | 0 | 0 | 0 | 0.063 | 0     | 0    | 0.579 | 0.607 |
| XP_008462<br>107.1 | XP_008443<br>206.1 | 533812 | 521518 | 3656.XP_0<br>08462107.1 | 3656.XP_0<br>08443206.1 | 0     | 0 | 0 | 0 | 0     | 0     | 0.6  | 0.056 | 0.606 |
| XP_008446<br>196.1 | XP_008443<br>206   | 523487 | 521518 | 3656.XP_0<br>08446196.  | 3656.XP_0<br>08443206.  | 0     | 0 | 0 | 0 | 0     | 0     | 0.6  | 0.056 | 0.606 |
|                    |                    |        |        | .1                      |                         |       |   | 1 |   |       | 1     |      |       |       |
| XP_008454<br>693.1 | XP_008440<br>310.1 | 528953 | 519647 | 3656.XP_0<br>08454693.1 | 3656.XP_0<br>08440310.1 | 0     | 0 | 0 | 0 | 0     | 0     | 0    | 0.606 | 0.606 |
| XP_008463<br>167.1 | XP_008460<br>145.1 | 534543 | 532534 | 3656.XP_0<br>08463167.1 | 3656.XP_0<br>08460145.1 | 0     | 0 | 0 | 0 | 0     | 0     | 0.6  | 0     | 0.6   |
| XP_008458<br>374.1 | XP_008446<br>196.1 | 531389 | 523487 | 3656.XP_0<br>08458374.1 | 3656.XP_0<br>08446196.1 | 0     | 0 | 0 | 0 | 0     | 0     | 0.6  | 0     | 0.6   |
| XP_008460<br>145.1 | XP_008446<br>229.1 | 532534 | 523509 | 3656.XP_0<br>08460145.1 | 3656.XP_0<br>08446229.1 | 0     | 0 | 0 | 0 | 0     | 0     | 0.6  | 0     | 0.6   |
| XP_008460<br>145.1 | XP_008457<br>154.1 | 532534 | 530584 | 3656.XP_0<br>08460145.1 | 3656.XP_0<br>08457154.1 | 0     | 0 | 0 | 0 | 0     | 0     | 0.6  | 0     | 0.6   |
| XP_008462<br>107.1 | XP_008458<br>374.1 | 533812 | 531389 | 3656.XP_0<br>08462107.1 | 3656.XP_0<br>08458374.1 | 0     | 0 | 0 | 0 | 0     | 0     | 0.6  | 0     | 0.6   |
| XP_008451<br>468.1 | XP_008444<br>380.1 | 526835 | 522291 | 3656.XP_0<br>08451468.1 | 3656.XP_0<br>08444380.1 | 0     | 0 | 0 | 0 | 0     | 0     | 0    | 0.592 | 0.592 |
| XP_008465<br>523.1 | XP_008445<br>911.1 | 536060 | 523289 | 3656.XP_0<br>08465523.1 | 3656.XP_0<br>08445911.1 | 0     | 0 | 0 | 0 | 0.045 | 0.322 | 0    | 0.42  | 0.591 |
| XP_008465<br>523.1 | XP_008444<br>380.1 | 536060 | 522291 | 3656.XP_0<br>08465523.1 | 3656.XP_0<br>08444380.1 | 0     | 0 | 0 | 0 | 0.045 | 0.322 | 0    | 0.42  | 0.591 |
| XP_008463<br>167.1 | XP_008452<br>914.1 | 534543 | 527786 | 3656.XP_0<br>08463167.1 | 3656.XP_0<br>08452914.1 | 0.065 | 0 | 0 | 0 | 0     | 0.047 | 0    | 0.574 | 0.587 |
| XP_008467<br>118.1 | XP_008438<br>969.1 | 537199 | 518799 | 3656.XP_0<br>08467118.1 | 3656.XP_0<br>08438969.1 | 0     | 0 | 0 | 0 | 0.052 | 0.281 | 0    | 0.423 | 0.572 |



|                    |                    |        |        |                         |                         |       |   |   |   |   |       |   |   |       |       |
|--------------------|--------------------|--------|--------|-------------------------|-------------------------|-------|---|---|---|---|-------|---|---|-------|-------|
| XP_008453<br>253.1 | XP_008452<br>100.1 | 528014 | 527257 | 3656.XP_0<br>08453253.1 | 3656.XP_0<br>08452100.1 | 0     | 0 | 0 | 0 | 0 | 0     | 0 | 0 | 0.421 | 0.42  |
| XP_008452<br>100.1 | XP_008438<br>969.1 | 527257 | 518799 | 3656.XP_0<br>08452100.1 | 3656.XP_0<br>08438969.1 | 0.085 | 0 | 0 | 0 | 0 | 0     | 0 | 0 | 0.378 | 0.406 |
| XP_008467<br>118   | XP_008452<br>914   | 537199 | 527786 | 3656.XP_0<br>08467118.  | 3656.XP_0<br>08452914.  | 0.171 | 0 | 0 | 0 | 0 | 0     | 0 | 0 | 0.312 | 0.405 |
| .1                 |                    |        |        | .1                      |                         |       |   | 1 |   |   |       |   | 1 |       |       |
| XP_008467<br>118.1 | XP_008441<br>351.1 | 537199 | 520304 | 3656.XP_0<br>08467118.1 | 3656.XP_0<br>08441351.1 | 0     | 0 | 0 | 0 | 0 | 0.101 | 0 | 0 | 0.363 | 0.402 |

---

**Table S11** Subnetwork profile of full-ripe fruit (40 DAP) generated by STRING and Cytoscape analyses.

| <b>ID name</b> | <b>BetweennessCentrality</b> | <b>ClosenessCentrality</b> | <b>Degree</b> | <b>NumberOfDirectedEdges</b> |
|----------------|------------------------------|----------------------------|---------------|------------------------------|
| XP_008438929.1 | 0.84210526                   | 0.52777778                 | 9             | 9                            |
| XP_008447733.1 | 0.28070175                   | 0.32758621                 | 4             | 4                            |
| XP_008452849.1 | 0                            | 0.36538462                 | 3             | 3                            |
| XP_008450968.1 | 0                            | 0.25675676                 | 3             | 3                            |
| XP_008455290.1 | 0                            | 0.25675676                 | 3             | 3                            |
| XP_008448661.1 | 0                            | 0.25675676                 | 3             | 3                            |
| XP_008438779.1 | 0                            | 0.36538462                 | 3             | 3                            |
| XP_008446732.1 | 0.28070175                   | 0.40425532                 | 3             | 3                            |
| XP_008465290.1 | 0                            | 0.36538462                 | 3             | 3                            |
| XP_008460595.1 | 0.10526316                   | 0.36538462                 | 2             | 2                            |
| XP_008459496.1 | 0                            | 0.38                       | 2             | 2                            |
| XP_008451613.1 | 0.35087719                   | 0.41304348                 | 2             | 2                            |
| XP_008444821.1 | 0.19883041                   | 0.31147541                 | 2             | 2                            |
| XP_008463923.1 | 0.19883041                   | 0.38                       | 2             | 2                            |
| XP_008466011.1 | 0.10526316                   | 0.28787879                 | 2             | 2                            |
| XP_008448578.1 | 0.10526316                   | 0.24675325                 | 2             | 2                            |
| XP_008443958.1 | 0                            | 1                          | 1             | 1                            |
| XP_008444036.1 | 0                            | 1                          | 1             | 1                            |
| XP_008443230.1 | 0                            | 0.35185185                 | 1             | 1                            |
| XP_008451866.1 | 0                            | 0.2                        | 1             | 1                            |
| XP_008461049.1 | 0                            | 0.27142857                 | 1             | 1                            |
| XP_008460254.1 | 0                            | 0.22619048                 | 1             | 1                            |

**Table S12** STRING interactions of subnetwork full-ripe fruit (40 DAP).

| #node1         | node2          | node1_string_internal_id | node2_string_internal_id | node1_external_id   | node2_external_id   | neighborhood_on_chromosome | gene_fusion | phylogenetic_cooccurrence | homology | coexpression | experimentally_determined_interaction | database_annotated | automated_textmining | combined_score |
|----------------|----------------|--------------------------|--------------------------|---------------------|---------------------|----------------------------|-------------|---------------------------|----------|--------------|---------------------------------------|--------------------|----------------------|----------------|
| XP_008465290.1 | XP_008452849.1 | 535896                   | 527746                   | 3656.XP_008465290.1 | 3656.XP_008452849.1 | 0.127                      | 0           | 0                         | 0        | 0.384        | 0.361                                 | 0                  | 0.692                | 0.879          |
| XP_008448578.1 | XP_008444821.1 | 524999                   | 522606                   | 3656.XP_008448578.1 | 3656.XP_008444821.1 | 0                          | 0           | 0                         | 0        | 0.075        | 0.825                                 | 0                  | 0.069                | 0.836          |
| XP_008451866.1 | XP_008448578.1 | 527092                   | 524999                   | 3656.XP_008451866.1 | 3656.XP_008448578.1 | 0                          | 0           | 0                         | 0        | 0            | 0                                     | 0                  | 0.711                | 0.711          |
| XP_008461049.1 | XP_008460595.1 | 533123                   | 532800                   | 3656.XP_008461049.1 | 3656.XP_008460595.1 | 0                          | 0           | 0                         | 0.595    | 0            | 0.193                                 | 0.6                | 0.221                | 0.688          |
| XP_008450968.1 | XP_008448661.1 | 526528                   | 525048                   | 3656.XP_008450968.1 | 3656.XP_008448661.1 | 0.055                      | 0           | 0                         | 0        | 0.072        | 0.045                                 | 0.65               | 0.08                 | 0.681          |
| XP_00845290.1  | XP_008450968.1 | 529346                   | 526528                   | 3656.XP_00845290.1  | 3656.XP_008450968.1 | 0.055                      | 0           | 0                         | 0        | 0.072        | 0.045                                 | 0.65               | 0.08                 | 0.681          |
| XP_008452849.1 | XP_008438779.1 | 527746                   | 518690                   | 3656.XP_008452849.1 | 3656.XP_008438779.1 | 0                          | 0           | 0                         | 0        | 0.359        | 0.288                                 | 0                  | 0.336                | 0.67           |
| XP_00845290.1  | XP_008448661.1 | 529346                   | 525048                   | 3656.XP_00845290.1  | 3656.XP_008448661.1 | 0                          | 0           | 0.449                     | 0.971    | 0            | 0                                     | 0.65               | 0.22                 | 0.656          |
| XP_008463923.1 | XP_008438929.1 | 535028                   | 518778                   | 3656.XP_008463923.1 | 3656.XP_008438929.1 | 0                          | 0           | 0                         | 0        | 0            | 0                                     | 0                  | 0.628                | 0.628          |
| XP_008450968.1 | XP_008447733.1 | 526528                   | 524493                   | 3656.XP_008450968.1 | 3656.XP_008447733.1 | 0                          | 0           | 0                         | 0        | 0            | 0                                     | 0.6                | 0                    | 0.6            |
| XP_00845290.1  | XP_008447733.1 | 529346                   | 524493                   | 3656.XP_00845290.1  | 3656.XP_008447733.1 | 0                          | 0           | 0                         | 0        | 0            | 0                                     | 0.6                | 0                    | 0.6            |
| XP_008448661.1 | XP_008447733.1 | 525048                   | 524493                   | 3656.XP_008448661.1 | 3656.XP_008447733.1 | 0                          | 0           | 0                         | 0        | 0            | 0                                     | 0.6                | 0                    | 0.6            |
| XP_008451613.1 | XP_008438929.1 | 526931                   | 518778                   | 3656.XP_008451613.1 | 3656.XP_008438929.1 | 0                          | 0           | 0                         | 0        | 0            | 0                                     | 0                  | 0.562                | 0.562          |
| XP_008446732.1 | XP_00844821.1  | 523841                   | 522606                   | 3656.XP_008446732.1 | 3656.XP_00844821.1  | 0                          | 0           | 0                         | 0        | 0.125        | 0.154                                 | 0                  | 0.42                 | 0.533          |
| XP_008444036.1 | XP_008443958.1 | 522087                   | 522029                   | 3656.XP_008444036.1 | 3656.XP_008443958.1 | 0                          | 0           | 0                         | 0        | 0            | 0                                     | 0                  | 0.533                | 0.533          |
| XP_008460595.1 | XP_008438929.1 | 532800                   | 518778                   | 3656.XP_008460595.1 | 3656.XP_008438929.1 | 0                          | 0           | 0                         | 0        | 0            | 0                                     | 0                  | 0.523                | 0.523          |
| XP_008466011.1 | XP_008463923.1 | 536414                   | 535028                   | 3656.XP_008466011.1 | 3656.XP_008463923.1 | 0                          | 0           | 0                         | 0        | 0            | 0.089                                 | 0                  | 0.495                | 0.52           |
| XP_008446732.1 | XP_008438929.1 | 523841                   | 518778                   | 3656.XP_008446732.1 | 3656.XP_008438929.1 | 0                          | 0           | 0                         | 0        | 0.045        | 0                                     | 0                  | 0.502                | 0.504          |
| XP_008451613.1 | XP_008447733.1 | 526931                   | 524493                   | 3656.XP_008451613.1 | 3656.XP_008447733.1 | 0                          | 0           | 0                         | 0        | 0            | 0                                     | 0                  | 0.486                | 0.485          |

|                    |                    |        |        |                         |                         |   |   |   |   |       |       |   |       |       |
|--------------------|--------------------|--------|--------|-------------------------|-------------------------|---|---|---|---|-------|-------|---|-------|-------|
| XP_008465<br>290.1 | XP_008438<br>779.1 | 535896 | 518690 | 3656.XP_0<br>08465290.1 | 3656.XP_0<br>08438779.1 | 0 | 0 | 0 | 0 | 0.187 | 0.343 | 0 | 0.096 | 0.474 |
| XP_008438<br>929.1 | XP_008438<br>779.1 | 518778 | 518690 | 3656.XP_0<br>08438929.1 | 3656.XP_0<br>08438779.1 | 0 | 0 | 0 | 0 | 0.046 | 0.091 | 0 | 0.439 | 0.471 |
| XP_008465<br>290.1 | XP_008438<br>929.1 | 535896 | 518778 | 3656.XP_0<br>08465290.1 | 3656.XP_0<br>08438929.1 | 0 | 0 | 0 | 0 | 0.045 | 0.182 | 0 | 0.356 | 0.452 |
| XP_008466<br>011.1 | XP_008460<br>254.1 | 536414 | 532610 | 3656.XP_0<br>08466011.1 | 3656.XP_0<br>08460254.1 | 0 | 0 | 0 | 0 | 0     | 0     | 0 | 0.432 | 0.432 |
| XP_008459<br>496.1 | XP_008446<br>732.1 | 532127 | 523841 | 3656.XP_0<br>08459496.1 | 3656.XP_0<br>08446732.1 | 0 | 0 | 0 | 0 | 0     | 0     | 0 | 0.422 | 0.422 |
| XP_008459<br>496.1 | XP_008438<br>929.1 | 532127 | 518778 | 3656.XP_0<br>08459496.1 | 3656.XP_0<br>08438929.1 | 0 | 0 | 0 | 0 | 0     | 0     | 0 | 0.421 | 0.42  |
| XP_008452<br>849.1 | XP_008438<br>929.1 | 527746 | 518778 | 3656.XP_0<br>08452849.1 | 3656.XP_0<br>08438929.1 | 0 | 0 | 0 | 0 | 0     | 0     | 0 | 0.42  | 0.42  |
| XP_008443<br>230.1 | XP_008438<br>929.1 | 521530 | 518778 | 3656.XP_0<br>08443230.1 | 3656.XP_0<br>08438929.1 | 0 | 0 | 0 | 0 | 0     | 0.302 | 0 | 0.188 | 0.408 |
